# Supplementary material
Source: publisher figshare collection journal article supplement (https://tandf.figshare.com/articles/dataset/_/5902240)

### ACC universal set

AUC: 0.978, 70 of 80 tumors, 87.5 %

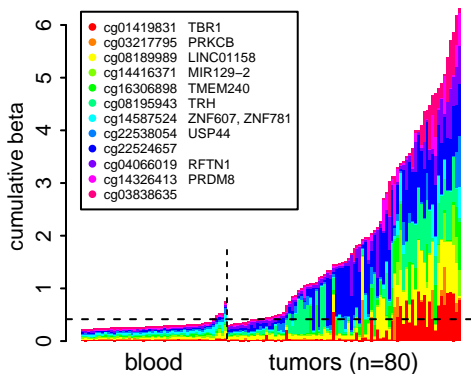

### BLCA universal set

AUC: 0.999, 415 of 418 tumors, 99.3 %

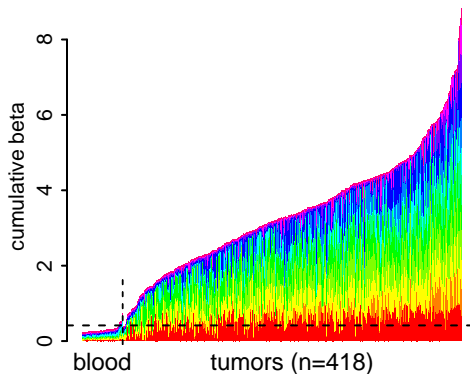

### BRCA universal set

AUC: 1, 790 of 790 tumors, 100 %

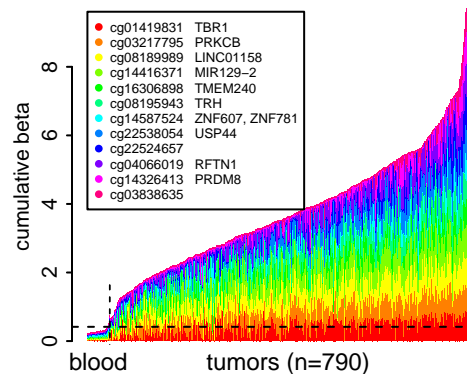

### CESC universal set

AUC: 1, 306 of 306 tumors, 100 %

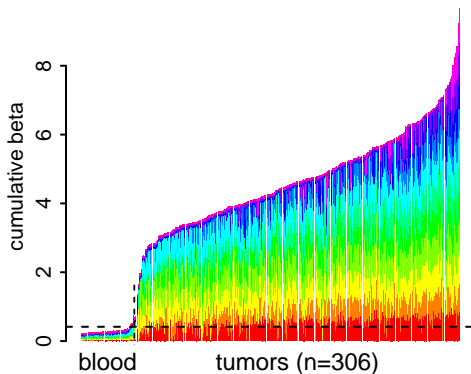

### CHOL universal set

AUC: 0.999, 36 of 36 tumors, 100 %

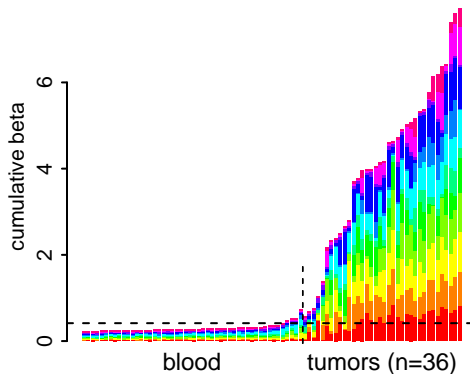

### COAD universal set

AUC: 1, 312 of 312 tumors, 100 %

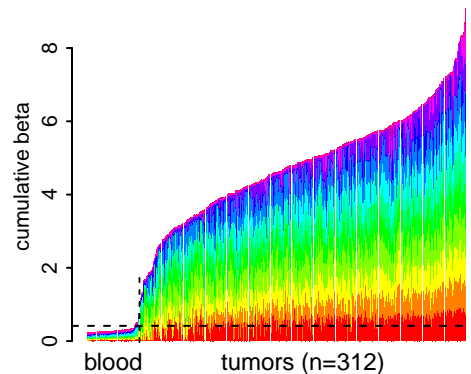

### DLBC universal set

AUC: 0.995, 46 of 48 tumors, 95.8 %

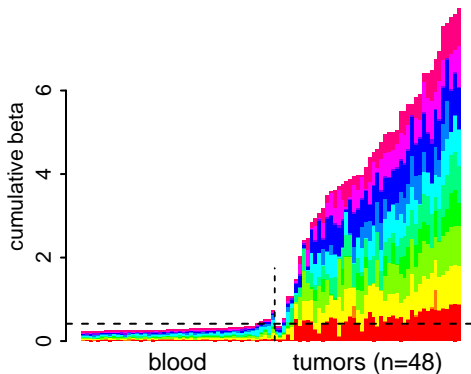

### ESCA universal set

AUC: 1, 185 of 185 tumors, 100 %

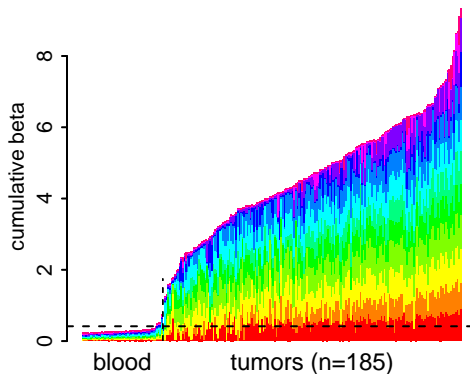

### GBM universal set

AUC: 0.999, 140 of 140 tumors, 100 %

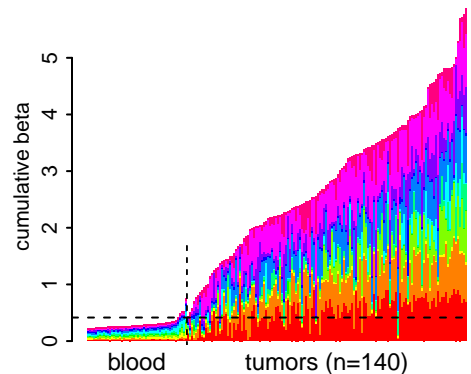

### HNSC universal set

AUC: 1, 528 of 528 tumors, 100 %

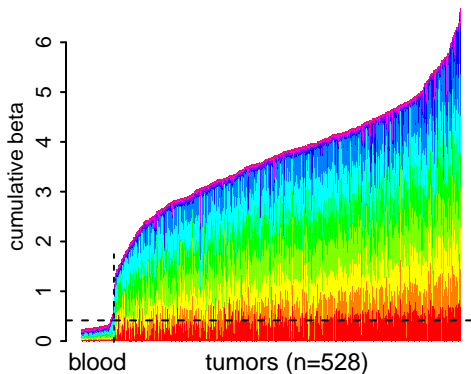

### KICH universal set

AUC: 0.937, 49 of 66 tumors, 74.2 %

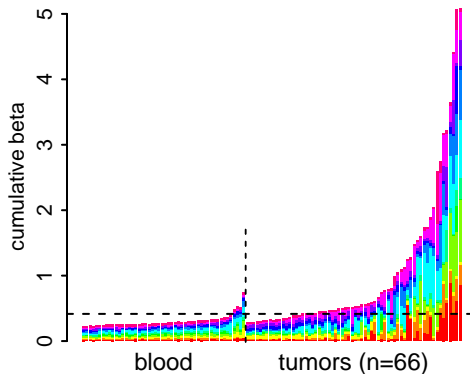

### KIRC universal set

AUC: 0.973, 280 of 324 tumors, 86.4 %

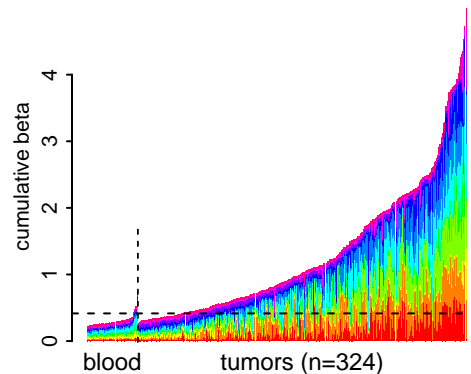

AUC: 0.918, 167 of 275 tumors, 60.7 %

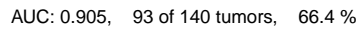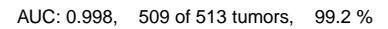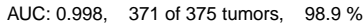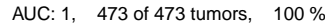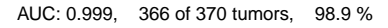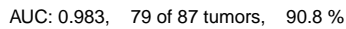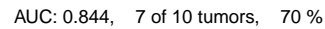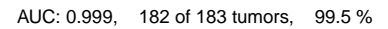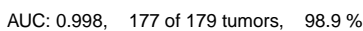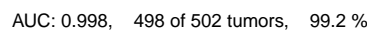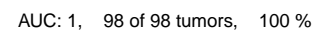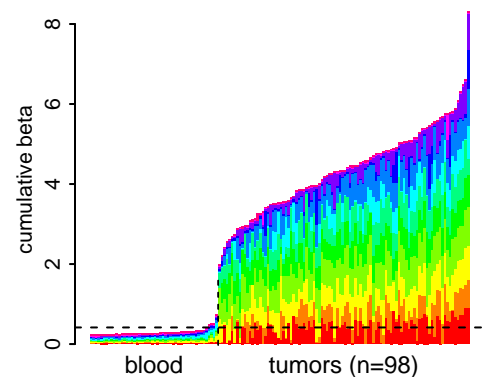

### SARC universal set

AUC: 0.956, 212 of 259 tumors, 81.9 %

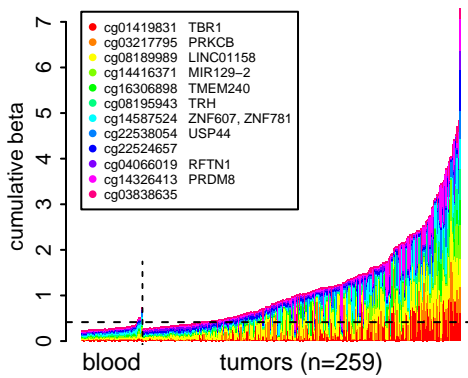

### SKCM universal set

AUC: 0.999, 103 of 105 tumors, 98.1 %

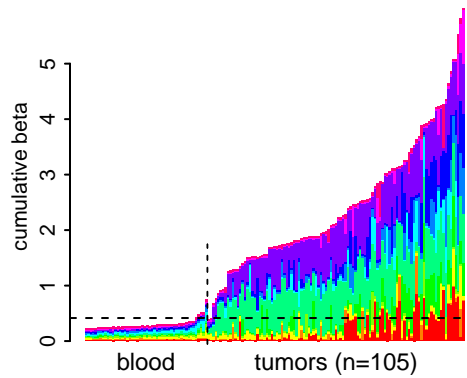

### STAD universal set

AUC: 1, 396 of 396 tumors, 100 %

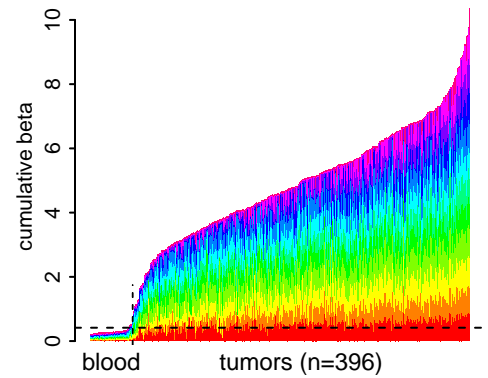

### TGCT universal set

AUC: 0.851, 66 of 150 tumors, 44 %

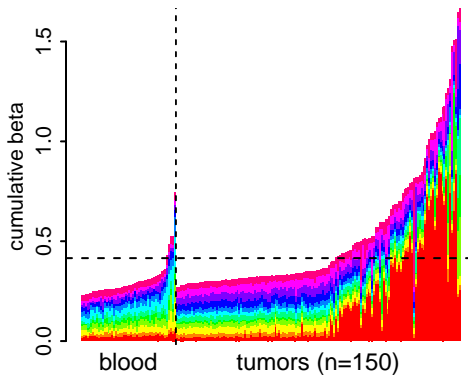

### THCA universal set

AUC: 0.871, 201 of 507 tumors, 39.6 %

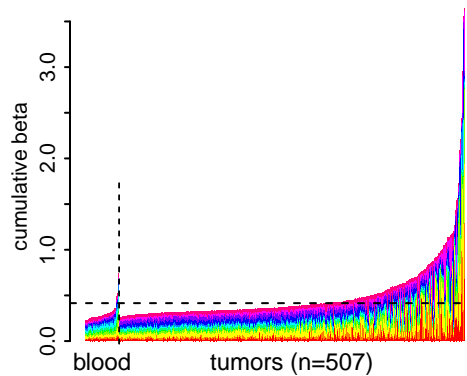

### THYM universal set

AUC: 0.871, 38 of 124 tumors, 30.6 %

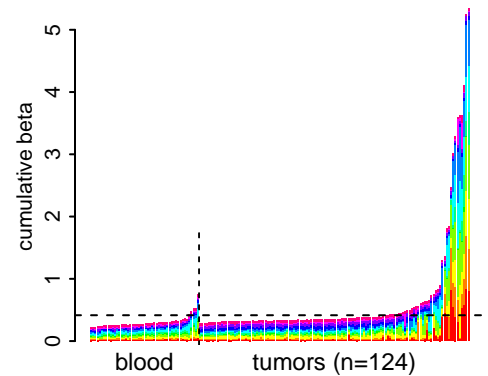

### UCEC universal set

AUC: 0.998, 436 of 438 tumors, 99.5 %

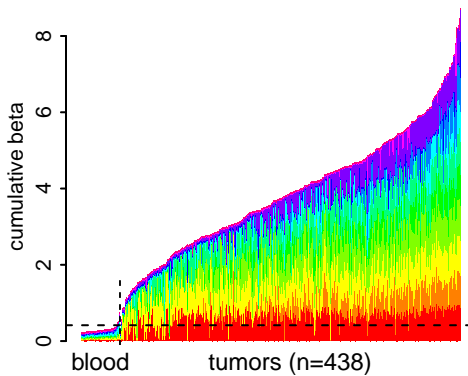

### UCS universal set

AUC: 1, 57 of 57 tumors, 100 %

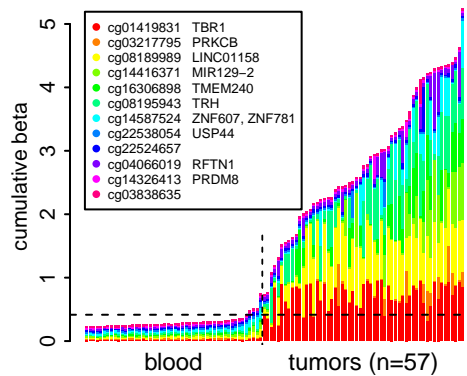

### UVM universal set

AUC: 0.955, 54 of 80 tumors, 67.5 %

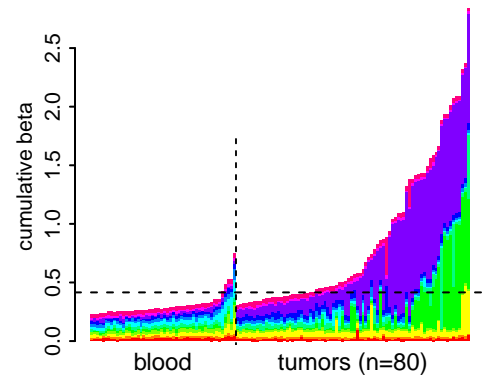

Supplement: Supplementary file 2 [file 2]
