# Supplementary material
Source: publisher figshare collection journal article supplement (https://tandf.figshare.com/articles/dataset/_/5902240)

ACC – Universal marker set

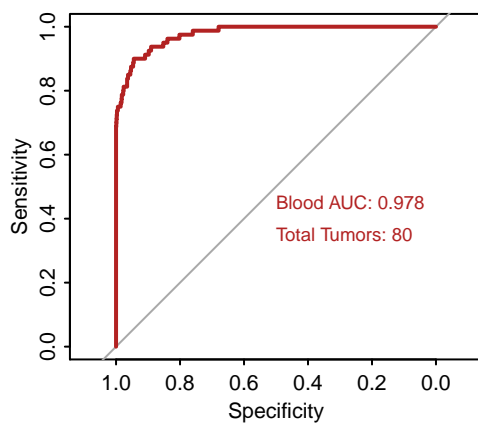

BLCA – Universal marker set

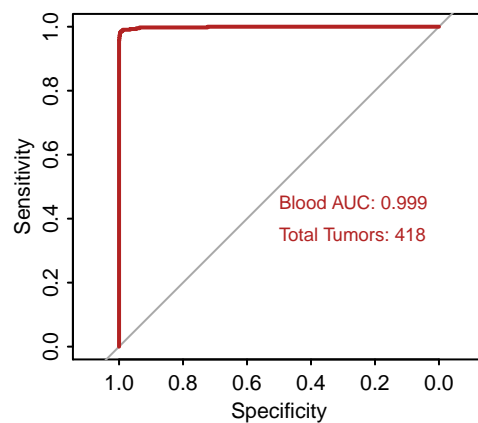

BRCA – Universal marker set

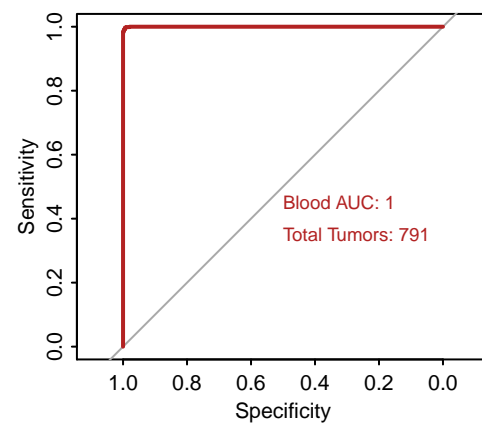

CESC – Universal marker set

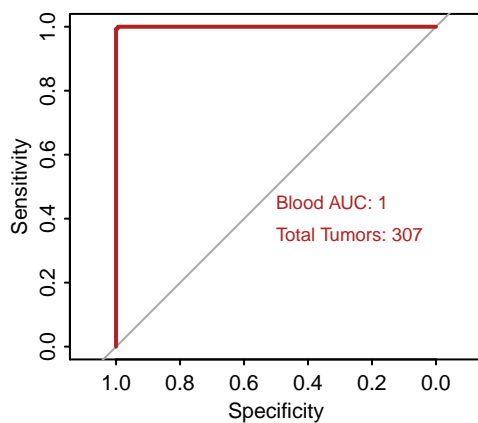

CHOL – Universal marker set

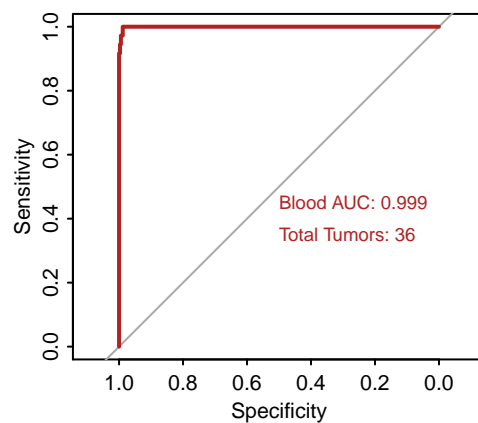

COAD – Universal marker set

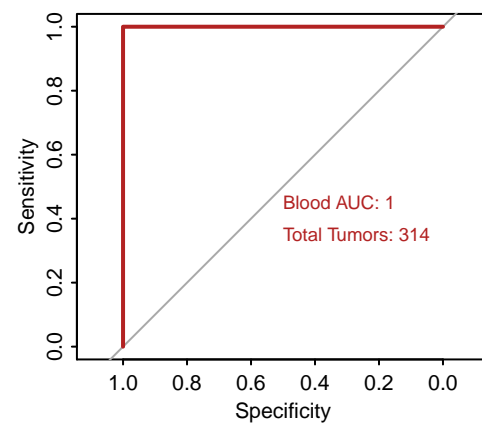

DLBC – Universal marker set

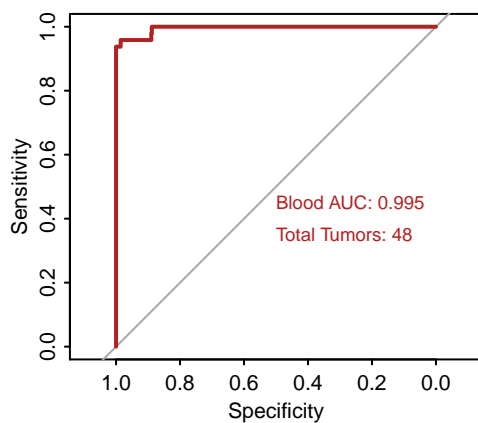

ESCA – Universal marker set

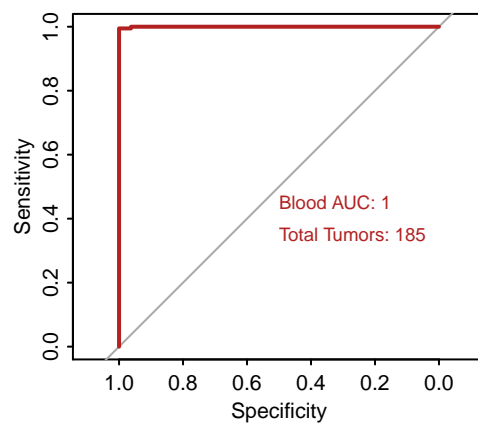

GBM – Universal marker set

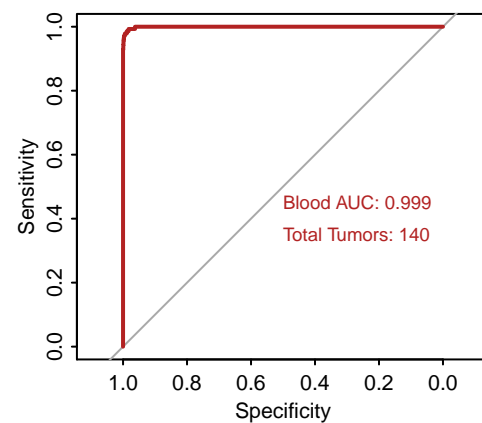

HNSC – Universal marker set

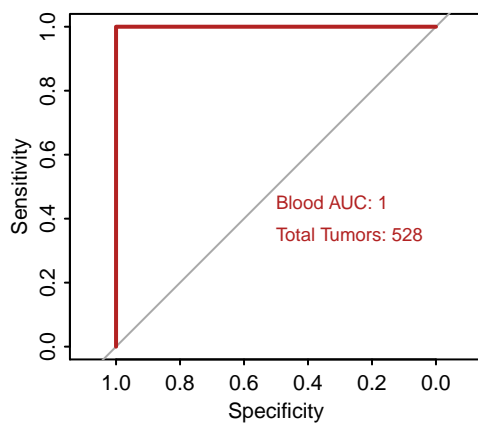

KICH – Universal marker set

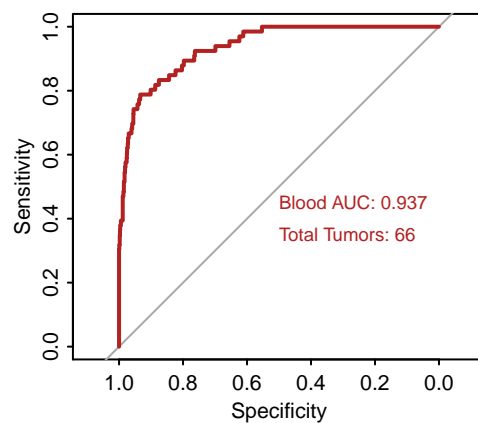

KIRC – Universal marker set

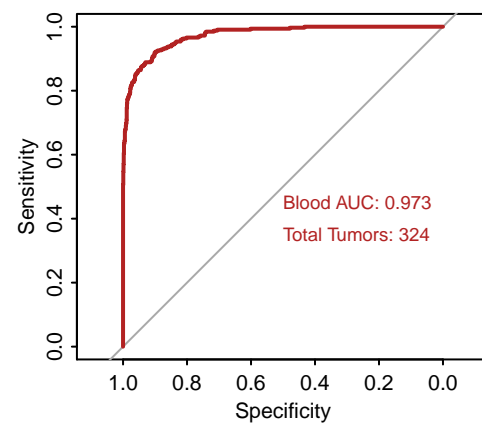

KIRP – Universal marker set

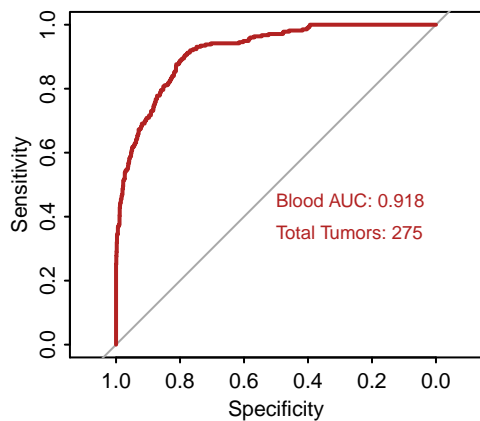

LAML – Universal marker set

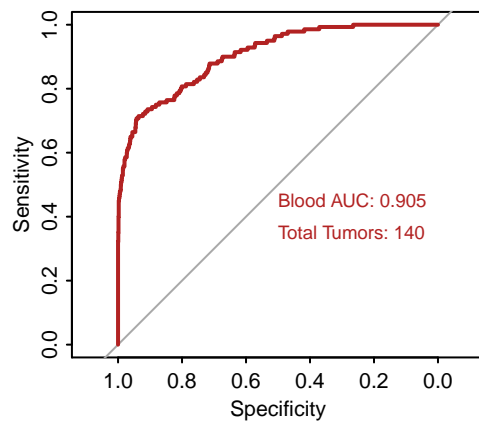

LGG – Universal marker set

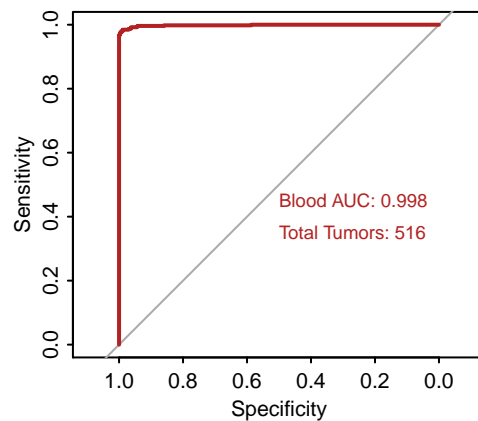

LIHC – Universal marker set

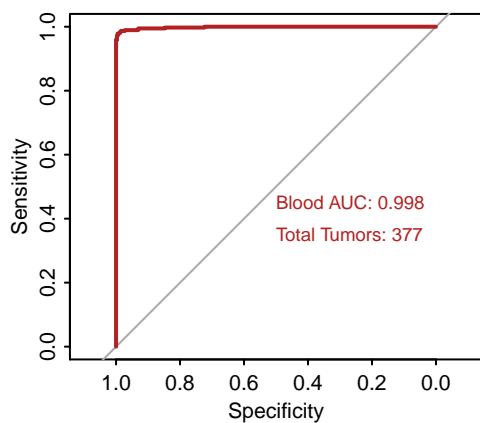

LUAD – Universal marker set

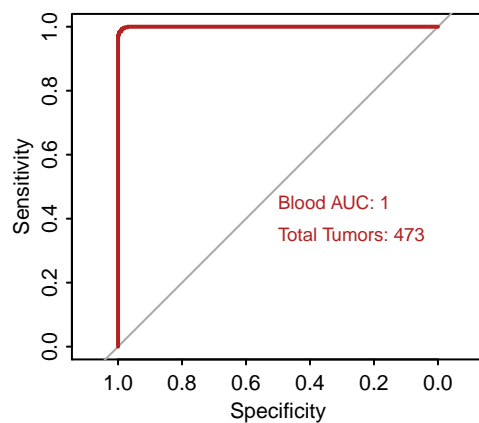

LUSC – Universal marker set

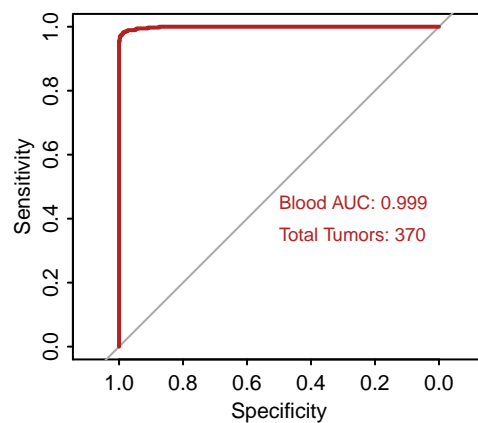

MESO – Universal marker set

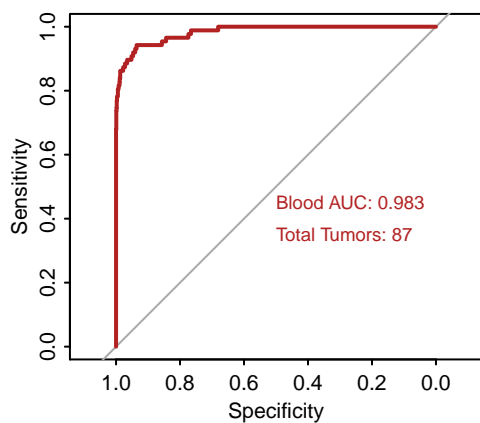

OV – Universal marker set

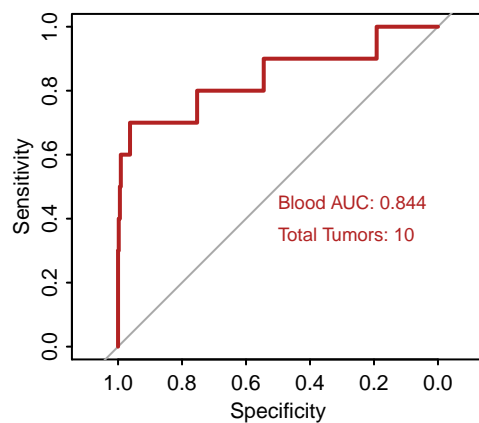

PAAD – Universal marker set

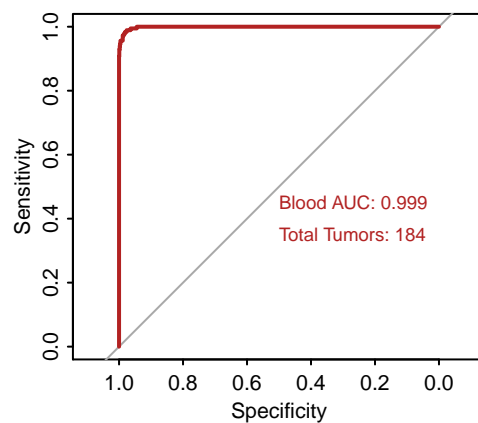

PCPG – Universal marker set

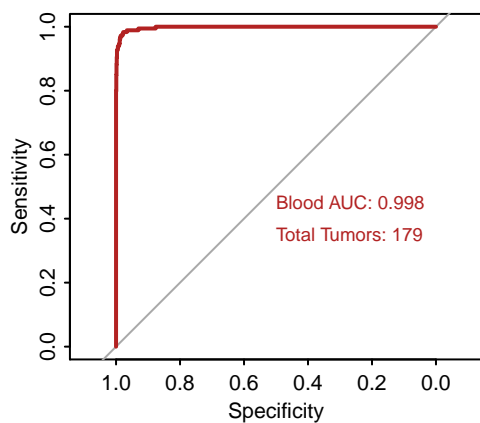

PRAD – Universal marker set

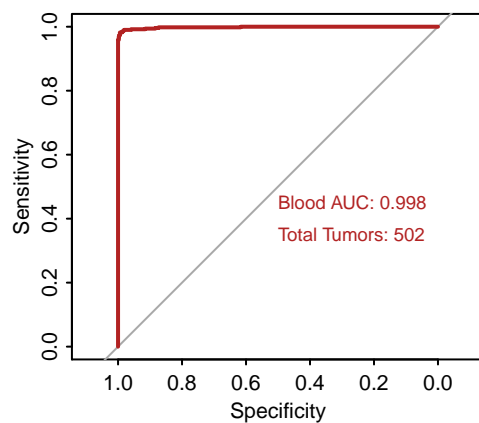

READ – Universal marker set

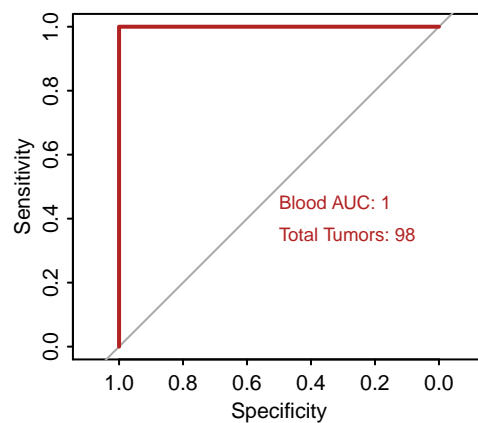

SARC – Universal marker set

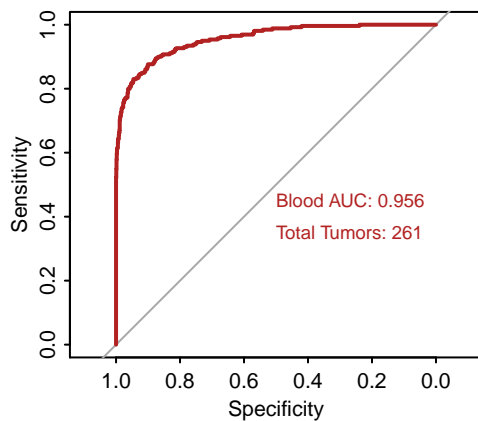

SKCM – Universal marker set

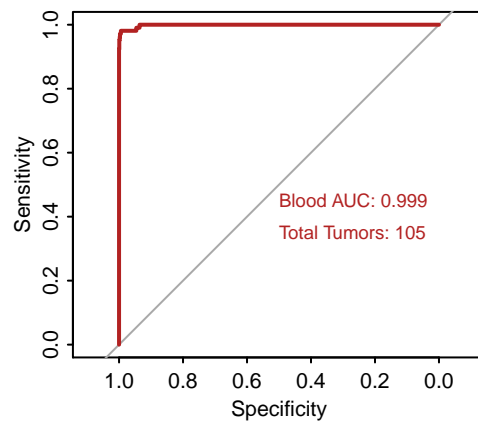

STAD – Universal marker set

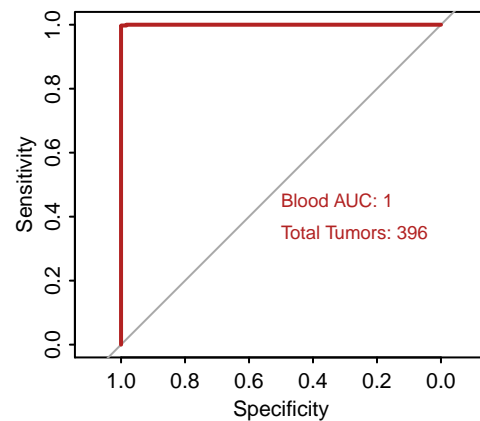

TGCT – Universal marker set

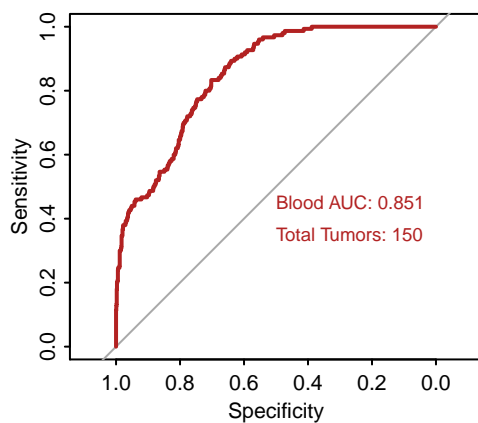

THCA – Universal marker set

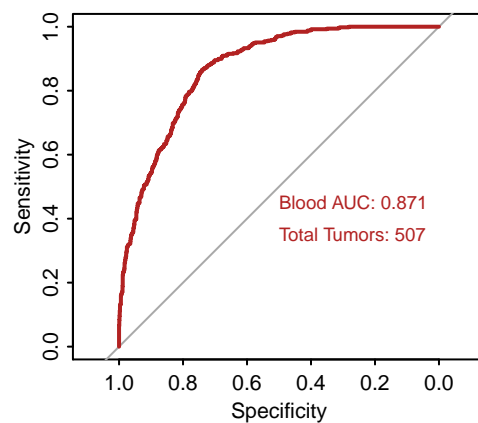

THYM – Universal marker set

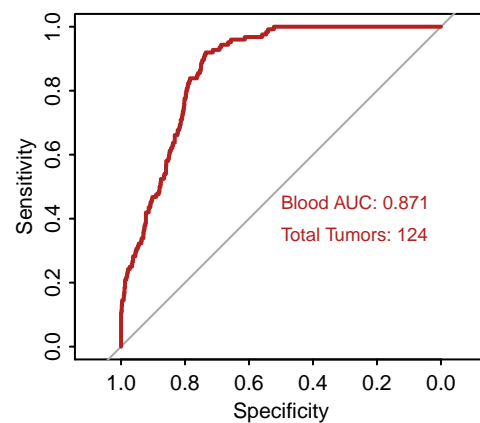

UCEC – Universal marker set

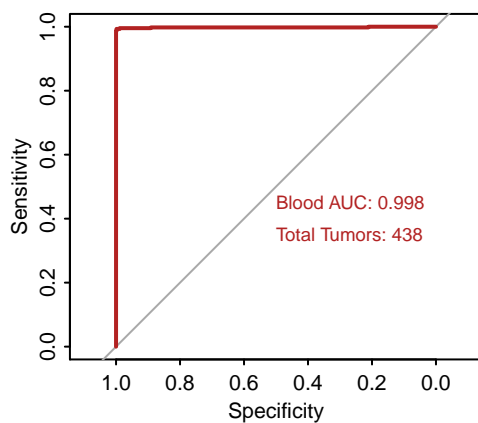

UCS – Universal marker set

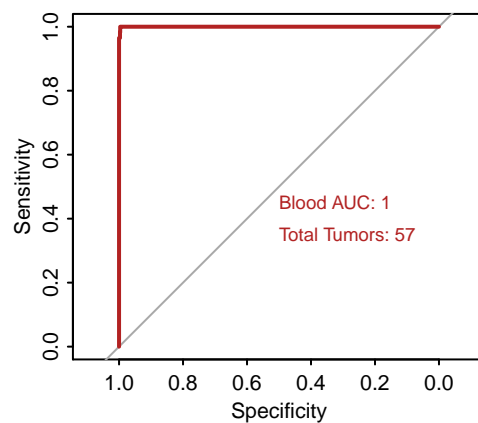

UVM – Universal marker set

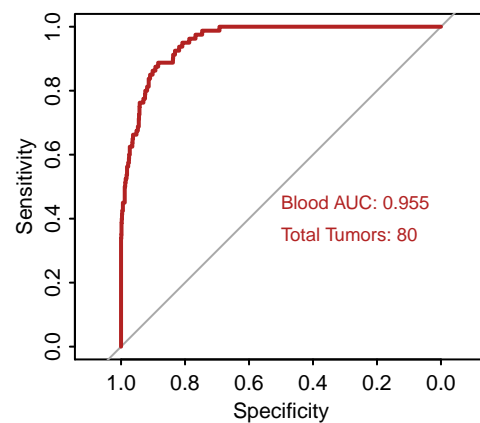

Supplement: Supplementary file 5 [file 2]
