# Supplementary material
Source: publisher figshare collection journal article supplement (https://tandf.figshare.com/articles/dataset/_/5902240)

### BLCA set of 1 markers

AUC: 0.944

CumFrDet: 73 %, MaxFrDet: 97.4%

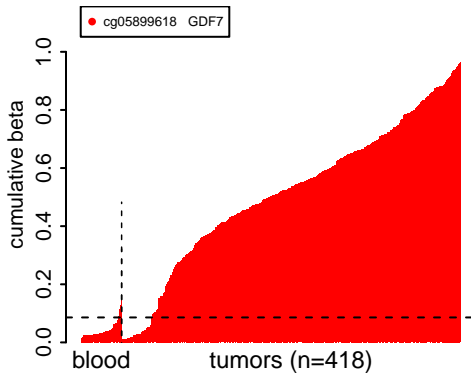

### BLCA set of 2 markers

AUC: 0.988

CumFrDet: 88.5 %, MaxFrDet: 97.4%

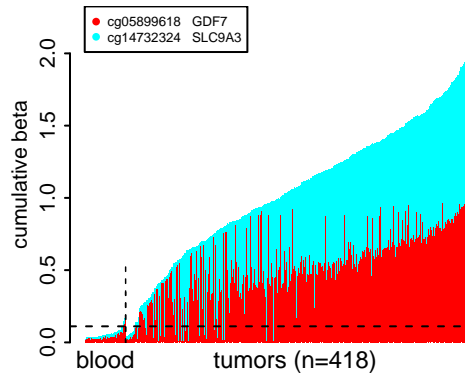

### BLCA set of 3 markers

AUC: 0.992

CumFrDet: 92.3 %, MaxFrDet: 97.4%

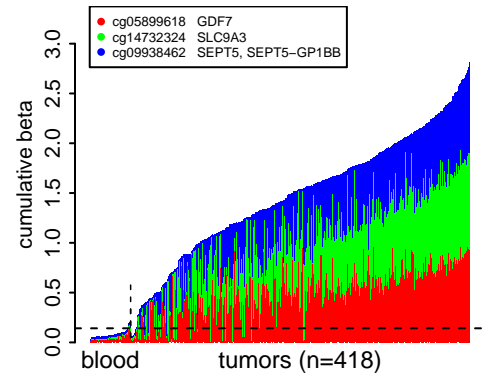

### BLCA set of 4 markers

AUC: 0.999

CumFrDet: 96.4 %, MaxFrDet: 97.4%

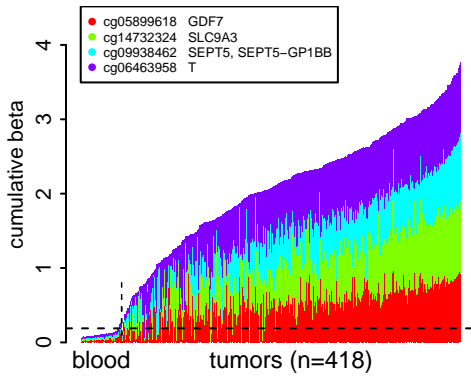

### BLCA set of 5 markers

AUC: 1

CumFrDet: 97.1 %, MaxFrDet: 97.4%

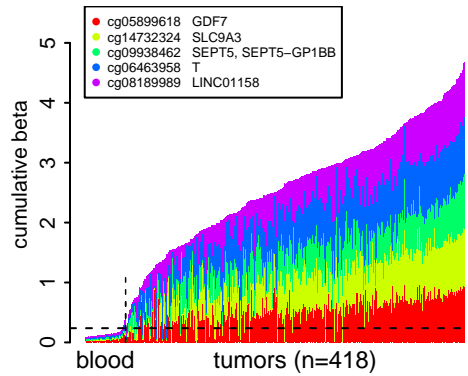

### BLCA set of 6 markers

AUC: 1

CumFrDet: 97.4 %, MaxFrDet: 97.4%

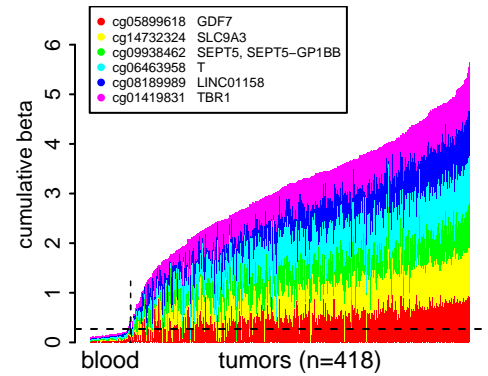

### BLCA set of 7 markers

AUC: 1

CumFrDet: 97.4 %, MaxFrDet: 97.4%

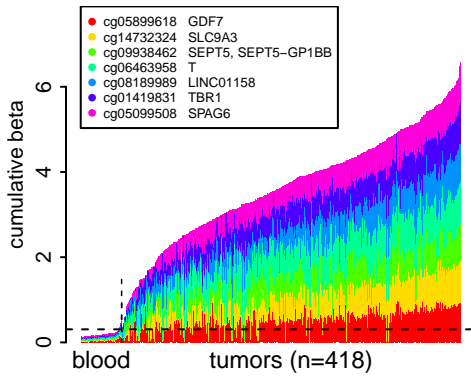

### BLCA set of 8 markers

AUC: 0.999

CumFrDet: 97.4 %, MaxFrDet: 97.4%

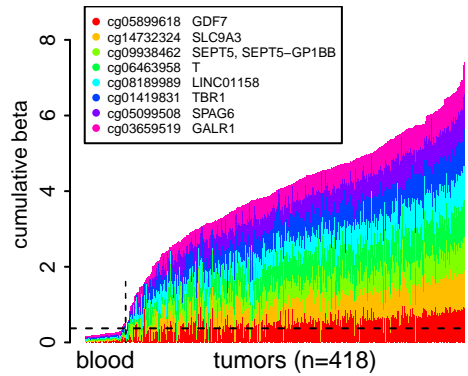

### BLCA set of 9 markers

AUC: 0.999

CumFrDet: 97.4 %, MaxFrDet: 97.4%

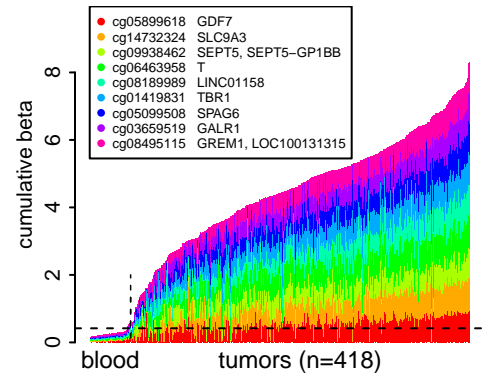

### BLCA set of 10 markers

AUC: 0.999

CumFrDet: 97.4 %, MaxFrDet: 97.4%

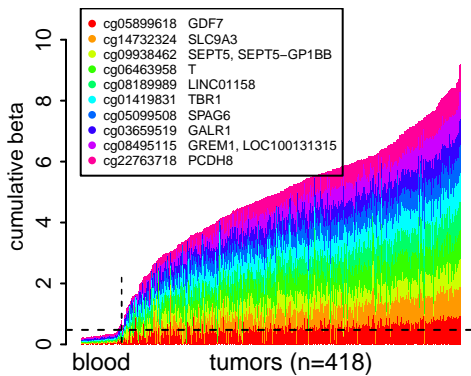

### BLCA set of 11 markers

AUC: 0.999

CumFrDet: 97.4 %, MaxFrDet: 97.4%

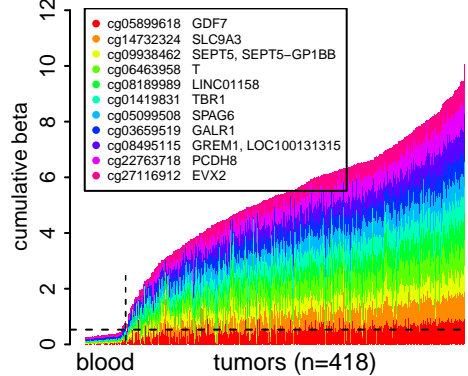

### BLCA set of 12 markers

AUC: 0.999

CumFrDet: 97.4 %, MaxFrDet: 97.4%

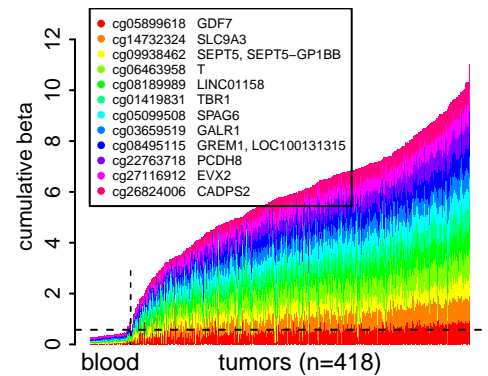

### BRCA set of 1 markers

AUC: 0.966

CumFrDet: 64.6 %, MaxFrDet: 98.2%

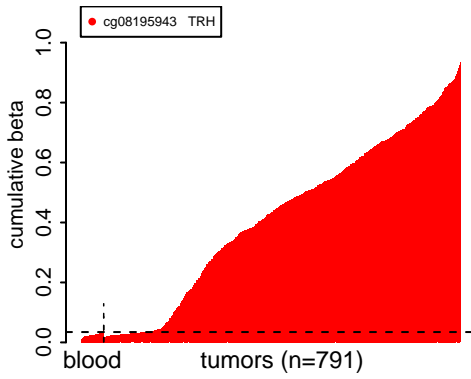

### BRCA set of 2 markers

AUC: 0.982

CumFrDet: 85.1 %, MaxFrDet: 98.2%

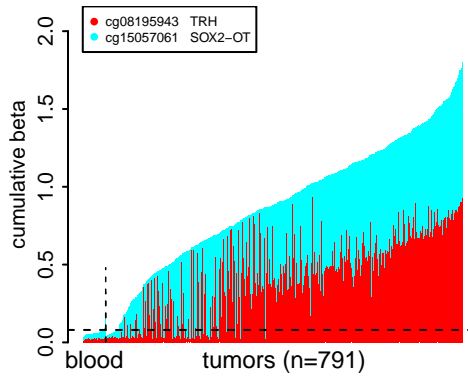

### BRCA set of 3 markers

AUC: 0.992

CumFrDet: 91 %, MaxFrDet: 98.2%

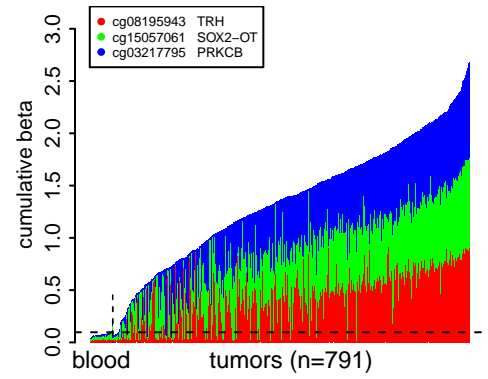

### BRCA set of 4 markers

AUC: 0.995

CumFrDet: 94.9 %, MaxFrDet: 98.2%

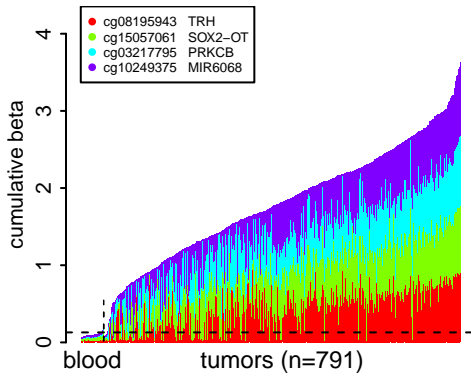

### BRCA set of 5 markers

AUC: 0.998

CumFrDet: 96.5 %, MaxFrDet: 98.2%

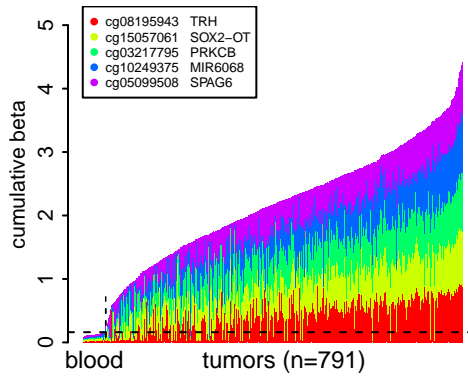

### BRCA set of 6 markers

AUC: 1

CumFrDet: 97.1 %, MaxFrDet: 98.2%

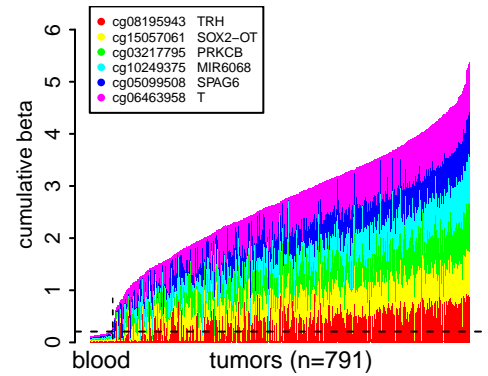

### BRCA set of 7 markers

AUC: 1

CumFrDet: 97.5 %, MaxFrDet: 98.2%

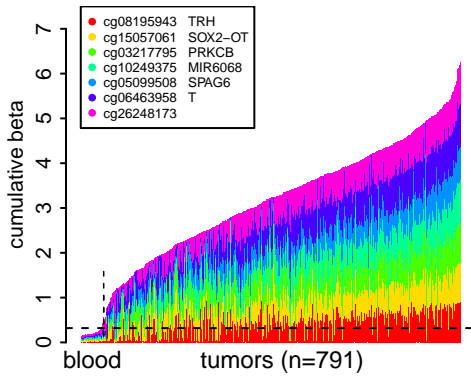

### BRCA set of 8 markers

AUC: 1

CumFrDet: 97.7 %, MaxFrDet: 98.2%

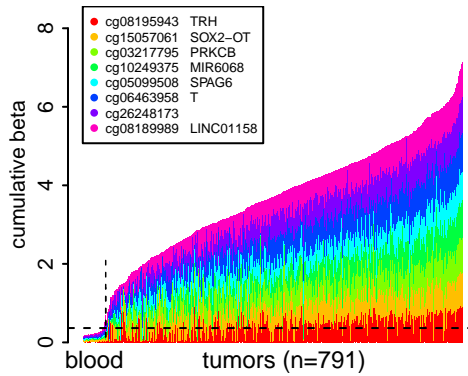

### BRCA set of 9 markers

AUC: 1

CumFrDet: 97.9 %, MaxFrDet: 98.2%

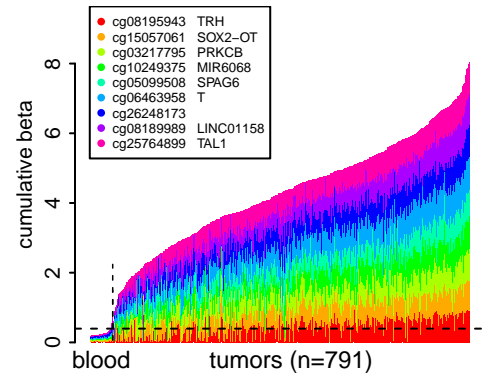

### BRCA set of 10 markers

AUC: 1

CumFrDet: 98 %, MaxFrDet: 98.2%

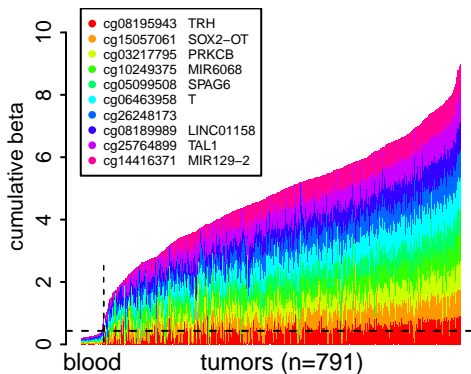

### BRCA set of 11 markers

AUC: 1

CumFrDet: 98.1 %, MaxFrDet: 98.2%

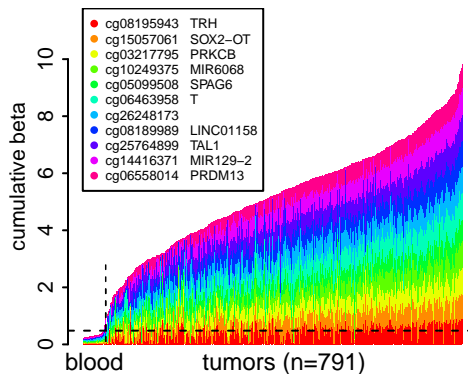

### BRCA set of 12 markers

AUC: 1

CumFrDet: 98.2 %, MaxFrDet: 98.2%

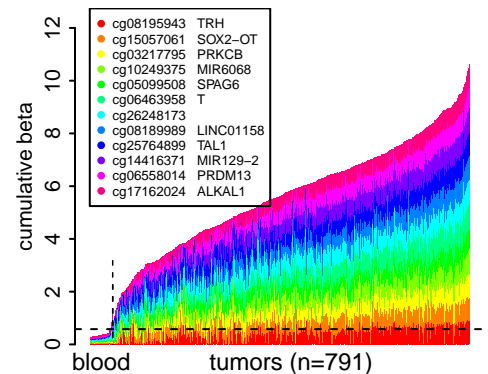

### CEC set of 1 markers

AUC: 0.991

CumFrDet: 94.8 %, MaxFrDet: 99.7%

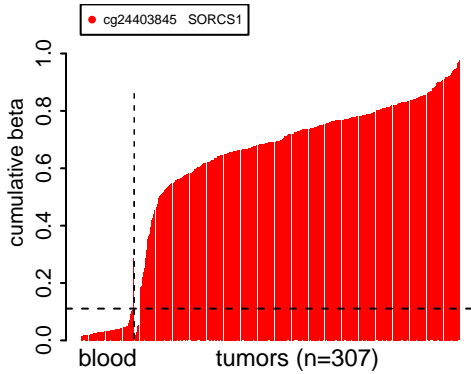

### CEC set of 2 markers

AUC: 0.997

CumFrDet: 97.7 %, MaxFrDet: 99.7%

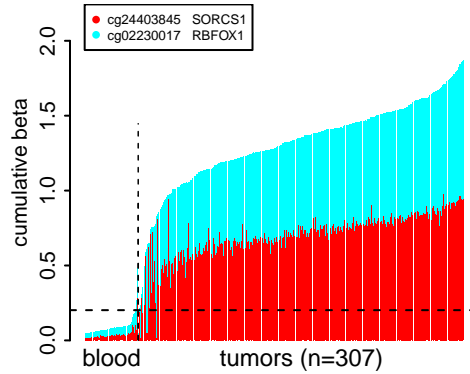

### CEC set of 3 markers

AUC: 1

CumFrDet: 99.7 %, MaxFrDet: 99.7%

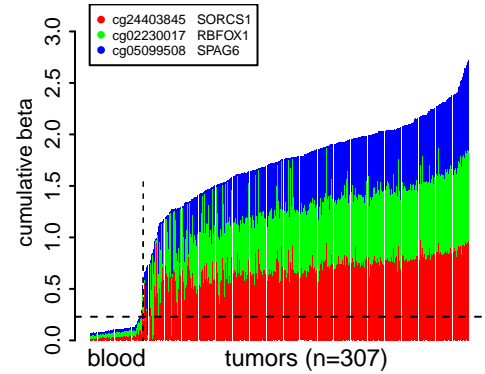

### CEC set of 4 markers

AUC: 1

CumFrDet: 99.7 %, MaxFrDet: 99.7%

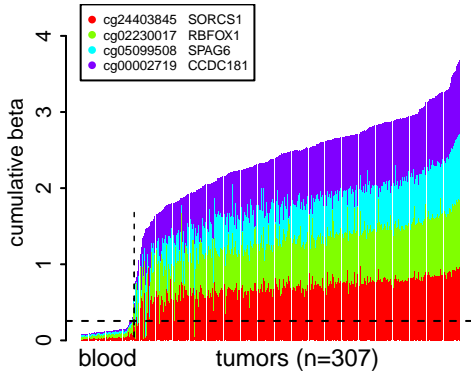

### CEC set of 5 markers

AUC: 1

CumFrDet: 99.7 %, MaxFrDet: 99.7%

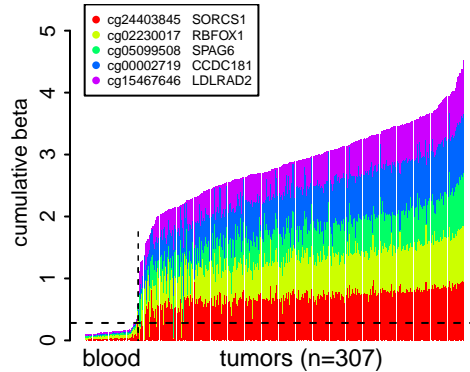

### CEC set of 6 markers

AUC: 1

CumFrDet: 99.7 %, MaxFrDet: 99.7%

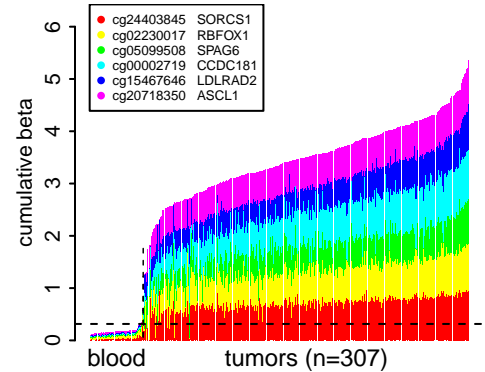

### CEC set of 7 markers

AUC: 1

CumFrDet: 99.7 %, MaxFrDet: 99.7%

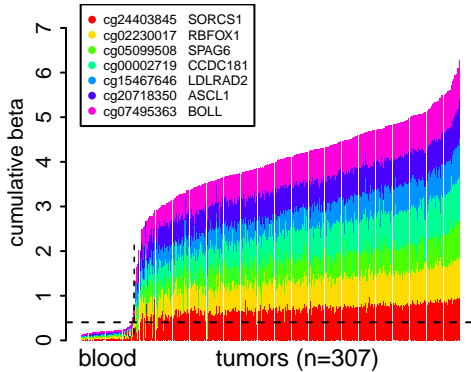

### CEC set of 8 markers

AUC: 1

CumFrDet: 99.7 %, MaxFrDet: 99.7%

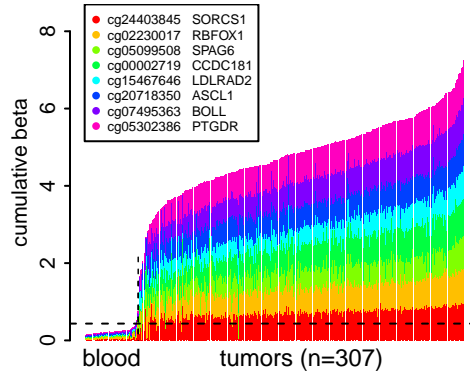

### CEC set of 9 markers

AUC: 1

CumFrDet: 99.7 %, MaxFrDet: 99.7%

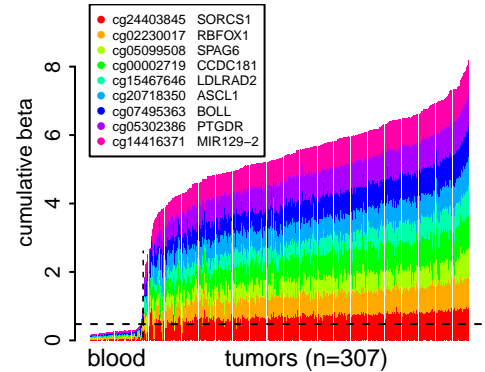

### CEC set of 10 markers

AUC: 1

CumFrDet: 99.7 %, MaxFrDet: 99.7%

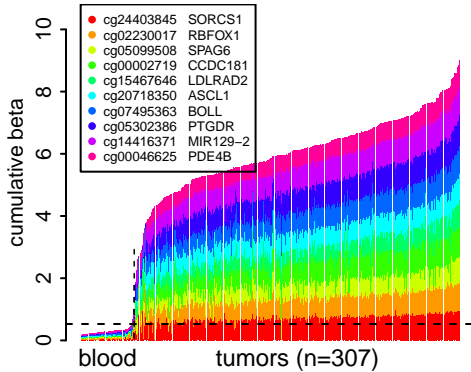

### CEC set of 11 markers

AUC: 1

CumFrDet: 99.7 %, MaxFrDet: 99.7%

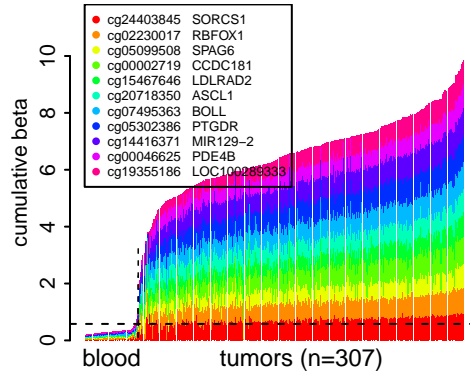

### CEC set of 12 markers

AUC: 1

CumFrDet: 99.7 %, MaxFrDet: 99.7%

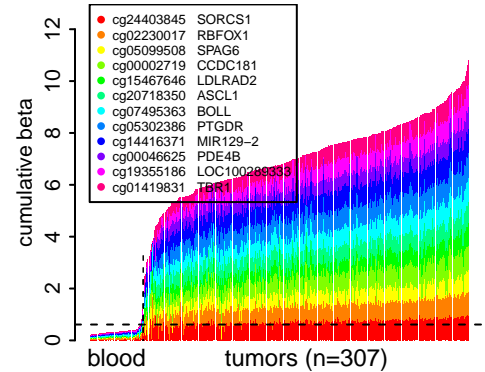

### CHOL set of 1 markers

AUC: 0.957

CumFrDet: 72.2 %, MaxFrDet: 97.2%

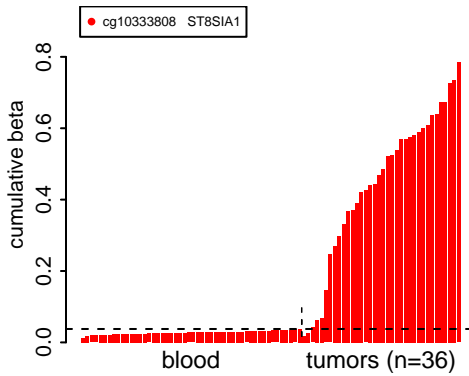

### CHOL set of 2 markers

AUC: 1

CumFrDet: 83.3 %, MaxFrDet: 97.2%

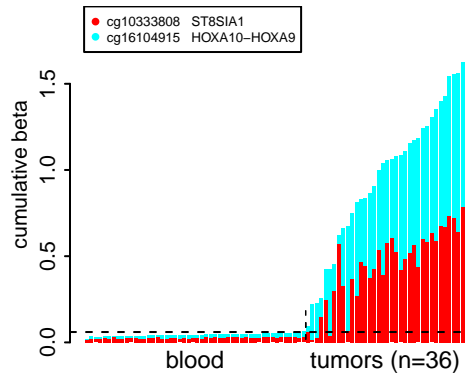

### CHOL set of 3 markers

AUC: 1

CumFrDet: 94.4 %, MaxFrDet: 97.2%

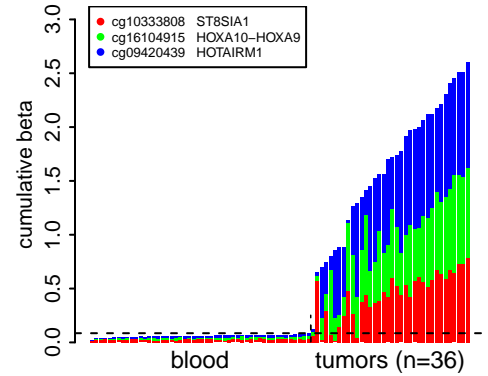

### CHOL set of 4 markers

AUC: 1

CumFrDet: 97.2 %, MaxFrDet: 97.2%

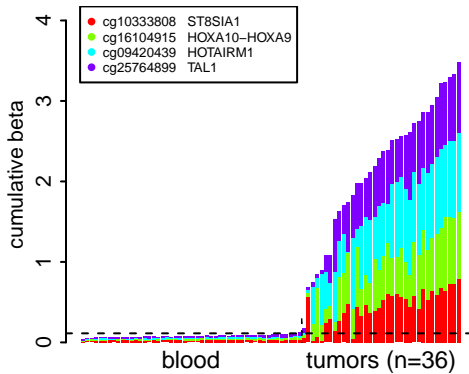

### CHOL set of 5 markers

AUC: 1

CumFrDet: 97.2 %, MaxFrDet: 97.2%

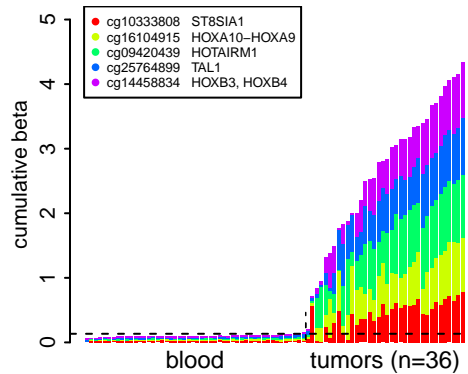

### CHOL set of 6 markers

AUC: 1

CumFrDet: 97.2 %, MaxFrDet: 97.2%

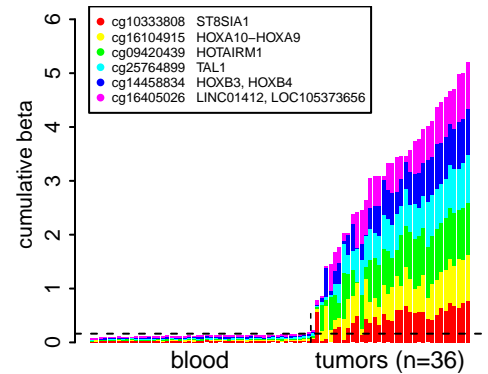

### CHOL set of 7 markers

AUC: 1

CumFrDet: 97.2 %, MaxFrDet: 97.2%

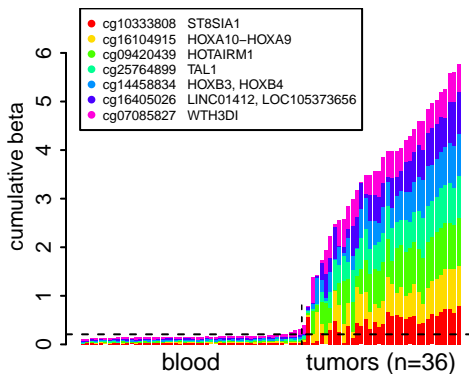

### CHOL set of 8 markers

AUC: 1

CumFrDet: 97.2 %, MaxFrDet: 97.2%

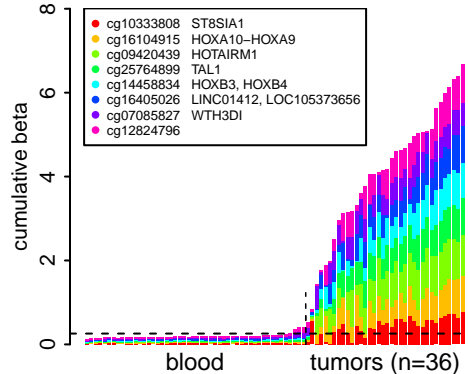

### CHOL set of 9 markers

AUC: 1

CumFrDet: 97.2 %, MaxFrDet: 97.2%

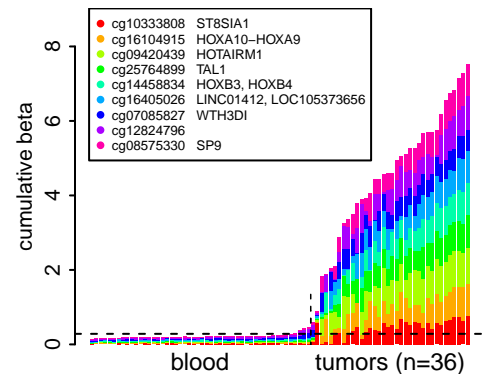

### CHOL set of 10 markers

AUC: 1

CumFrDet: 97.2 %, MaxFrDet: 97.2%

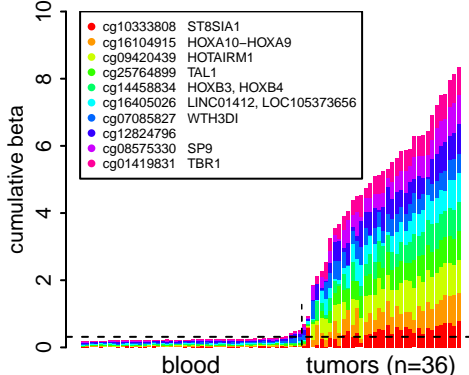

### CHOL set of 11 markers

AUC: 1

CumFrDet: 97.2 %, MaxFrDet: 97.2%

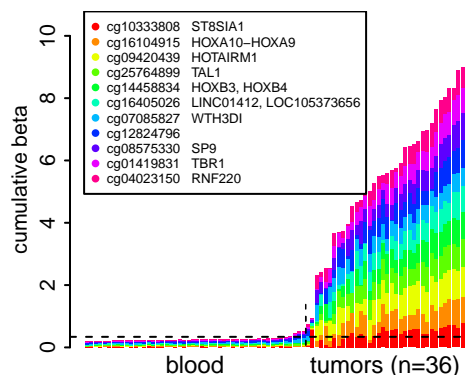

### CHOL set of 12 markers

AUC: 1

CumFrDet: 97.2 %, MaxFrDet: 97.2%

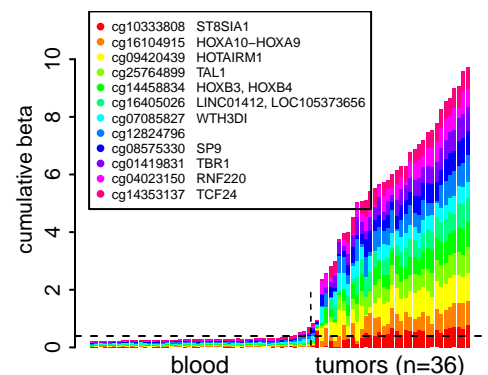

### COAD set of 1 markers

AUC: 0.994

CumFrDet: 98.7 %, MaxFrDet: 100%

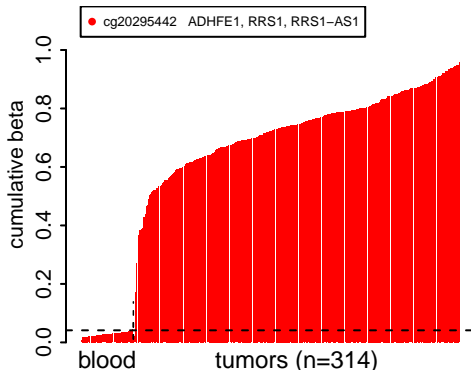

### COAD set of 2 markers

AUC: 1

CumFrDet: 100 %, MaxFrDet: 100%

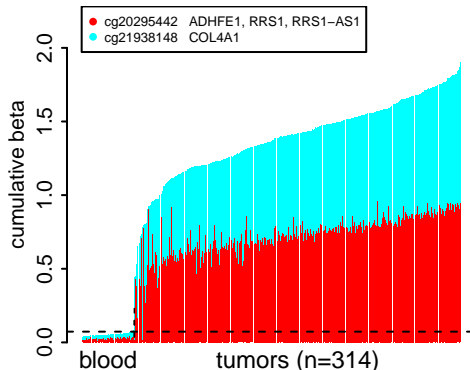

### COAD set of 3 markers

AUC: 1

CumFrDet: 100 %, MaxFrDet: 100%

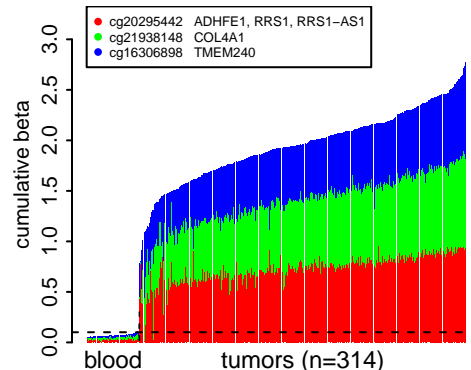

### COAD set of 4 markers

AUC: 1

CumFrDet: 100 %, MaxFrDet: 100%

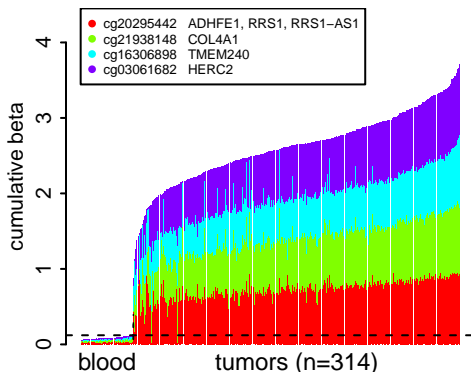

### COAD set of 5 markers

AUC: 1

CumFrDet: 100 %, MaxFrDet: 100%

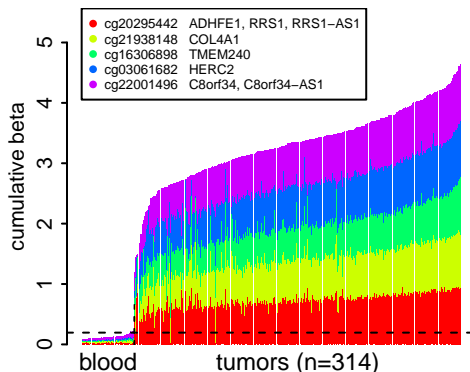

### COAD set of 6 markers

AUC: 1

CumFrDet: 100 %, MaxFrDet: 100%

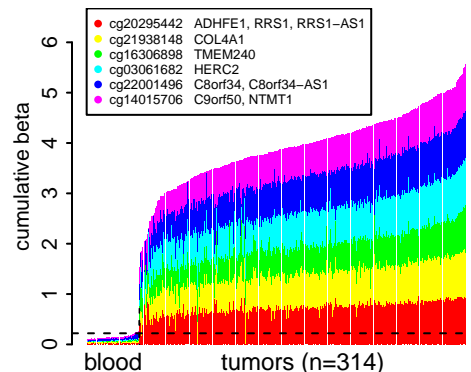

### COAD set of 7 markers

AUC: 1

CumFrDet: 100 %, MaxFrDet: 100%

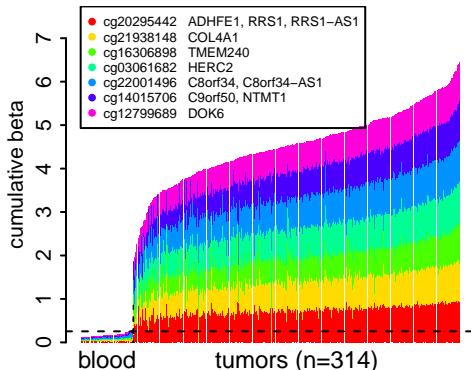

### COAD set of 8 markers

AUC: 1

CumFrDet: 100 %, MaxFrDet: 100%

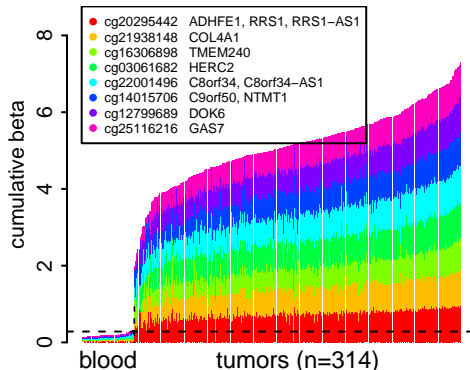

### COAD set of 9 markers

AUC: 1

CumFrDet: 100 %, MaxFrDet: 100%

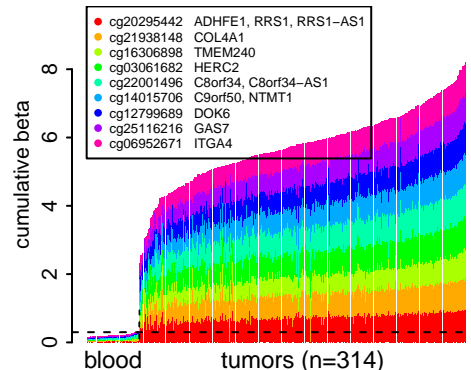

### COAD set of 10 markers

AUC: 1

CumFrDet: 100 %, MaxFrDet: 100%

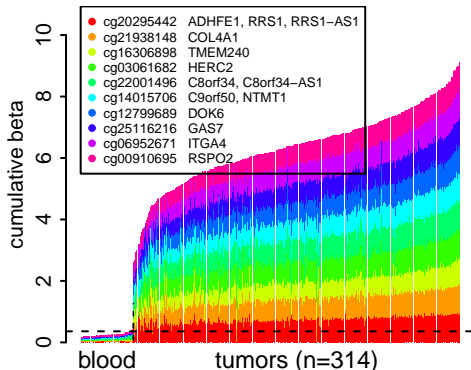

### COAD set of 11 markers

AUC: 1

CumFrDet: 100 %, MaxFrDet: 100%

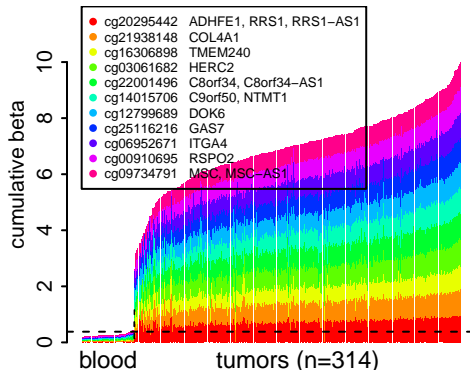

### COAD set of 12 markers

AUC: 1

CumFrDet: 100 %, MaxFrDet: 100%

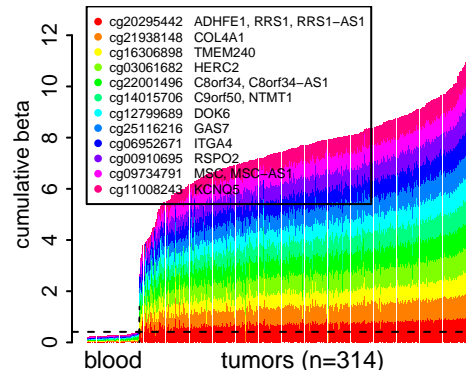

### ESCA set of 1 markers

AUC: 0.945

CumFrDet: 78.9 %, MaxFrDet: 98.9%

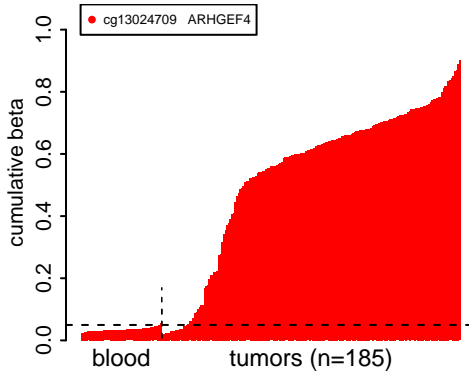

### ESCA set of 2 markers

AUC: 0.994

CumFrDet: 96.2 %, MaxFrDet: 98.9%

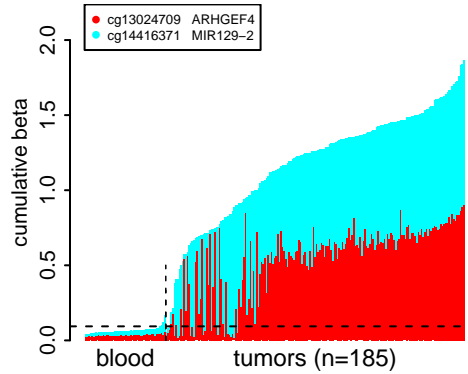

### ESCA set of 3 markers

AUC: 1

CumFrDet: 98.9 %, MaxFrDet: 98.9%

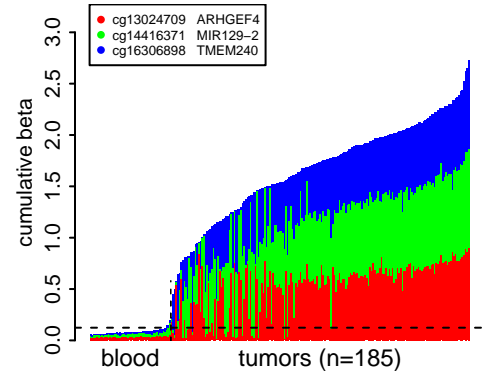

### ESCA set of 4 markers

AUC: 1

CumFrDet: 98.9 %, MaxFrDet: 98.9%

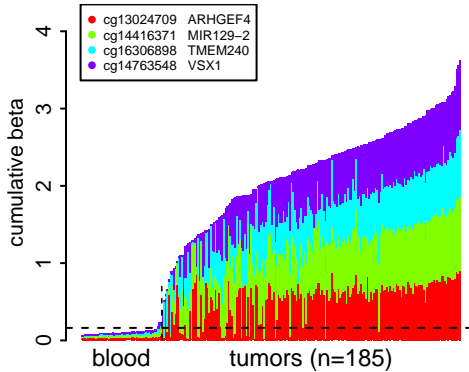

### ESCA set of 5 markers

AUC: 1

CumFrDet: 98.9 %, MaxFrDet: 98.9%

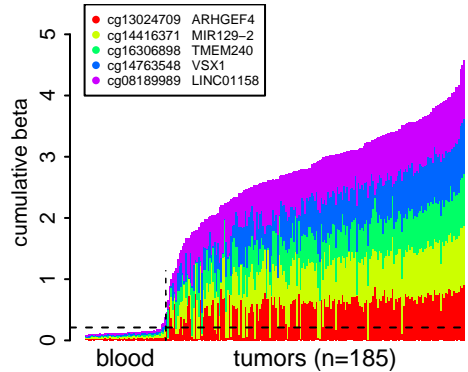

### ESCA set of 6 markers

AUC: 1

CumFrDet: 98.9 %, MaxFrDet: 98.9%

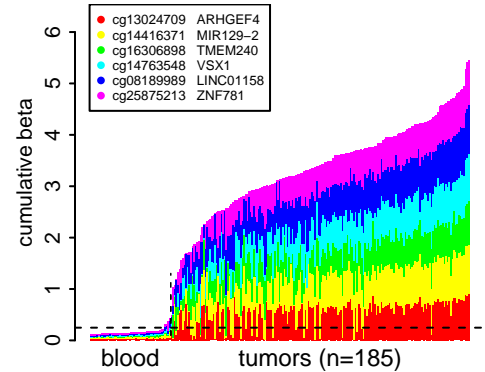

### ESCA set of 7 markers

AUC: 1

CumFrDet: 98.9 %, MaxFrDet: 98.9%

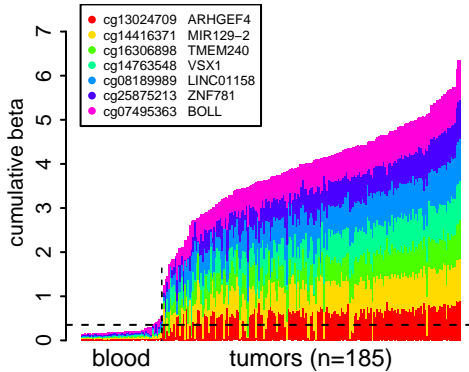

### ESCA set of 8 markers

AUC: 1

CumFrDet: 98.9 %, MaxFrDet: 98.9%

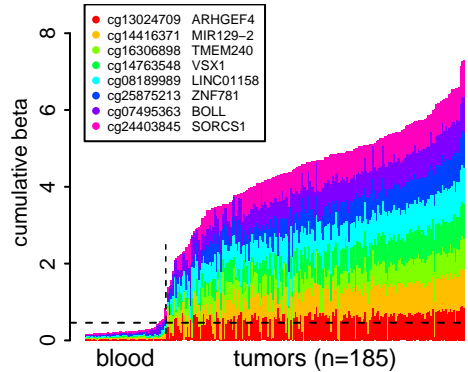

### ESCA set of 9 markers

AUC: 1

CumFrDet: 98.9 %, MaxFrDet: 98.9%

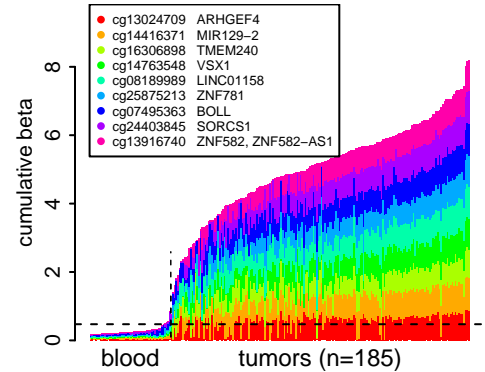

### ESCA set of 10 markers

AUC: 1

CumFrDet: 98.9 %, MaxFrDet: 98.9%

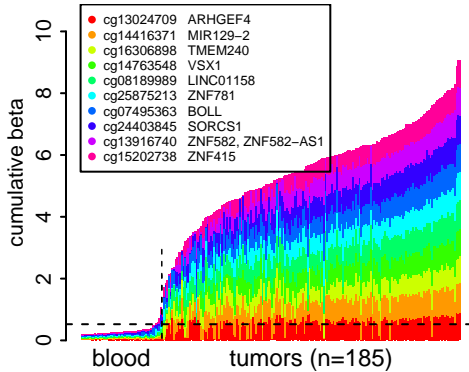

### ESCA set of 11 markers

AUC: 1

CumFrDet: 98.9 %, MaxFrDet: 98.9%

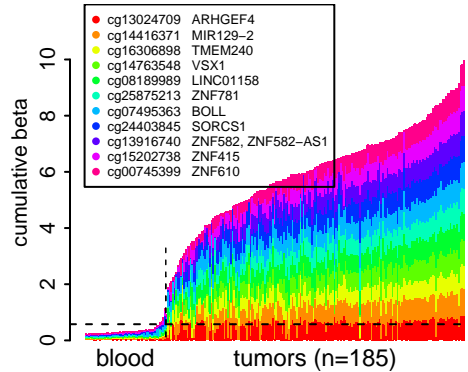

### ESCA set of 12 markers

AUC: 1

CumFrDet: 98.9 %, MaxFrDet: 98.9%

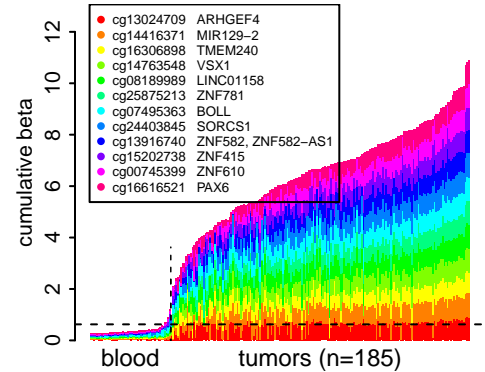

### GBM set of 1 markers

AUC: 1

CumFrDet: 70.7 %, MaxFrDet: 100%

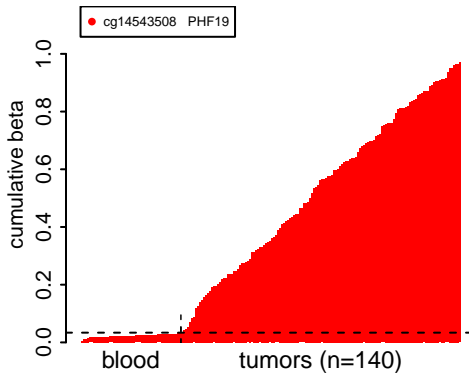

### GBM set of 2 markers

AUC: 1

CumFrDet: 95.7 %, MaxFrDet: 100%

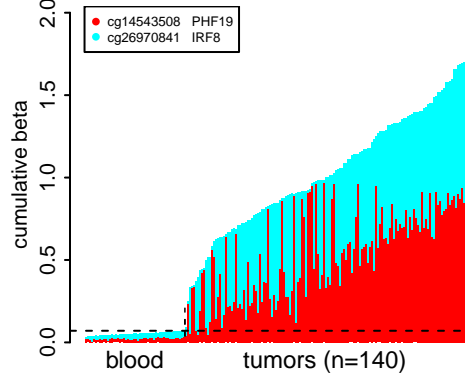

### GBM set of 3 markers

AUC: 1

CumFrDet: 99.3 %, MaxFrDet: 100%

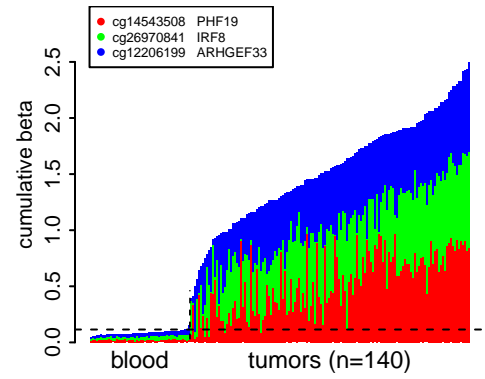

### GBM set of 4 markers

AUC: 1

CumFrDet: 100 %, MaxFrDet: 100%

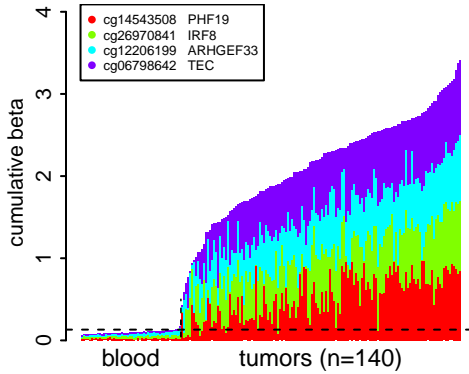

### GBM set of 5 markers

AUC: 1

CumFrDet: 100 %, MaxFrDet: 100%

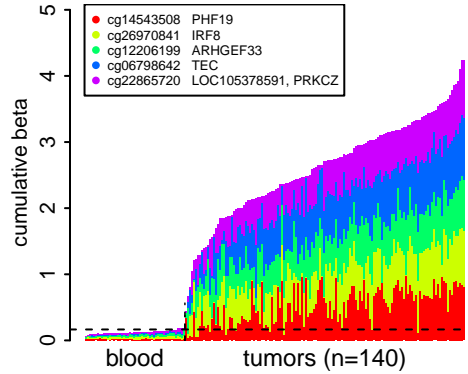

### GBM set of 6 markers

AUC: 1

CumFrDet: 100 %, MaxFrDet: 100%

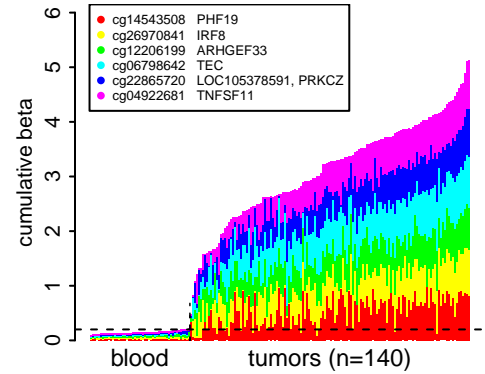

### GBM set of 7 markers

AUC: 1

CumFrDet: 100 %, MaxFrDet: 100%

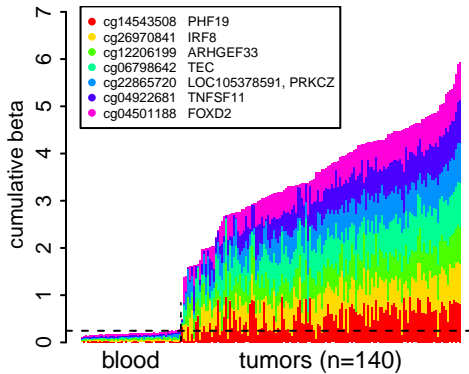

### GBM set of 8 markers

AUC: 1

CumFrDet: 100 %, MaxFrDet: 100%

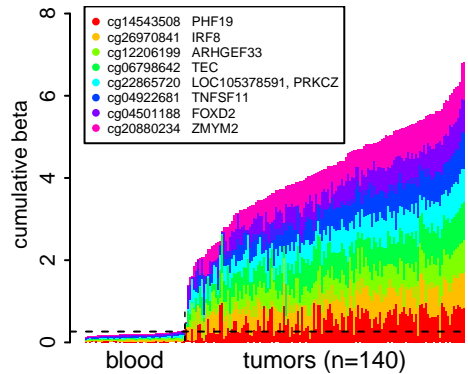

### GBM set of 9 markers

AUC: 1

CumFrDet: 100 %, MaxFrDet: 100%

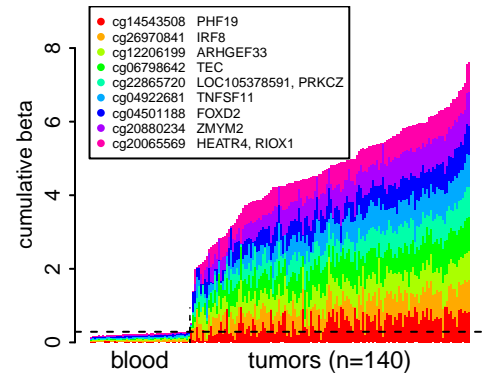

### GBM set of 10 markers

AUC: 1

CumFrDet: 100 %, MaxFrDet: 100%

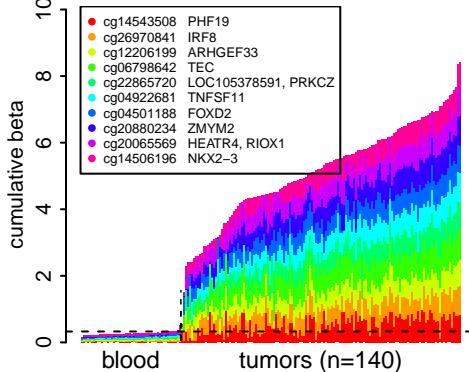

### GBM set of 11 markers

AUC: 1

CumFrDet: 100 %, MaxFrDet: 100%

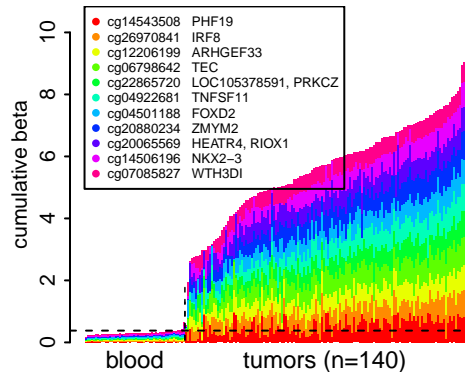

### GBM set of 12 markers

AUC: 1

CumFrDet: 100 %, MaxFrDet: 100%

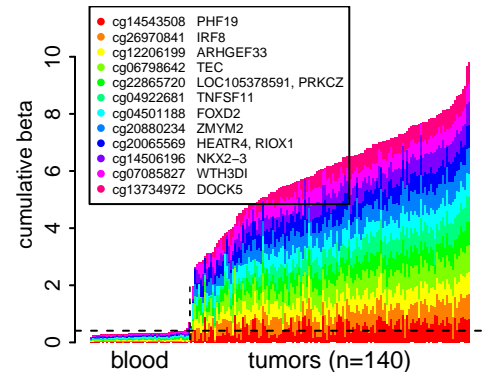

### HNSC set of 1 markers

AUC: 0.999

CumFrDet: 78.6 %, MaxFrDet: 100%

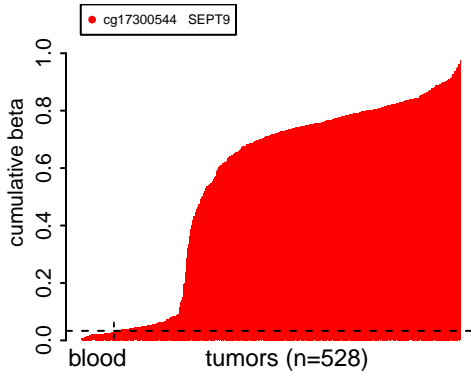

### HNSC set of 2 markers

AUC: 0.999

CumFrDet: 98.1 %, MaxFrDet: 100%

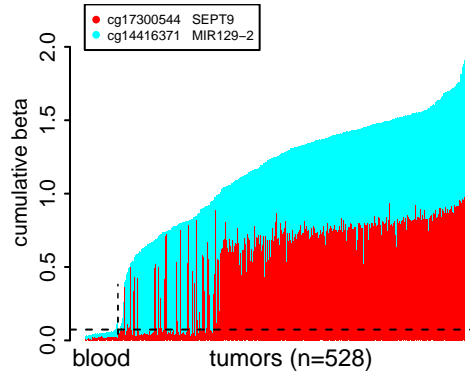

### HNSC set of 3 markers

AUC: 1

CumFrDet: 99.8 %, MaxFrDet: 100%

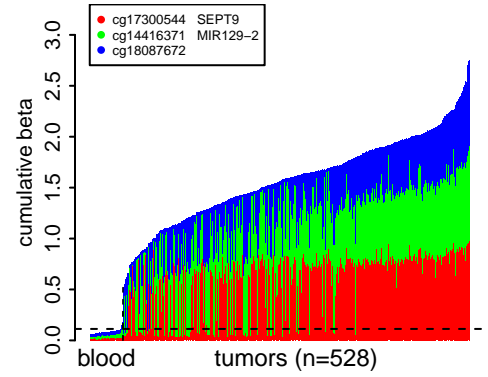

### HNSC set of 4 markers

AUC: 1

CumFrDet: 100 %, MaxFrDet: 100%

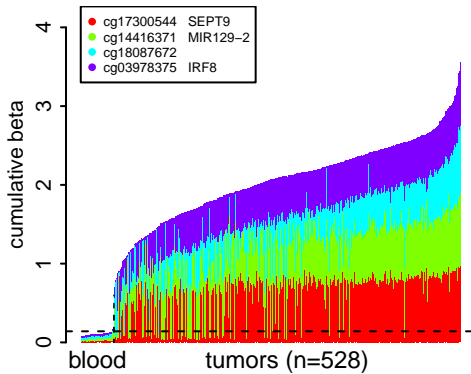

### HNSC set of 5 markers

AUC: 1

CumFrDet: 100 %, MaxFrDet: 100%

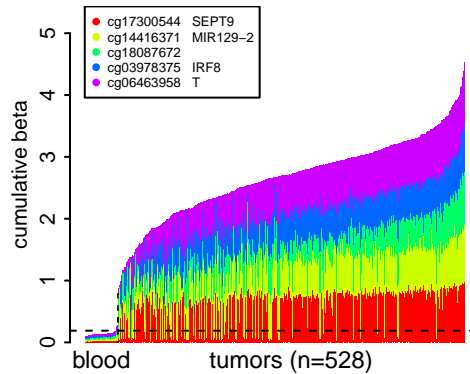

### HNSC set of 6 markers

AUC: 1

CumFrDet: 100 %, MaxFrDet: 100%

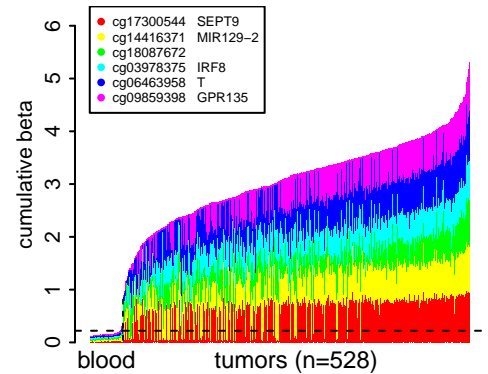

### HNSC set of 7 markers

AUC: 1

CumFrDet: 100 %, MaxFrDet: 100%

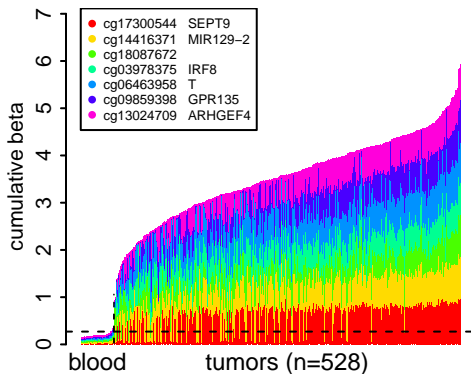

### HNSC set of 8 markers

AUC: 1

CumFrDet: 100 %, MaxFrDet: 100%

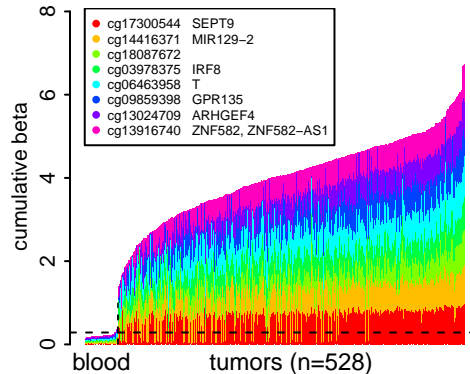

### HNSC set of 9 markers

AUC: 1

CumFrDet: 100 %, MaxFrDet: 100%

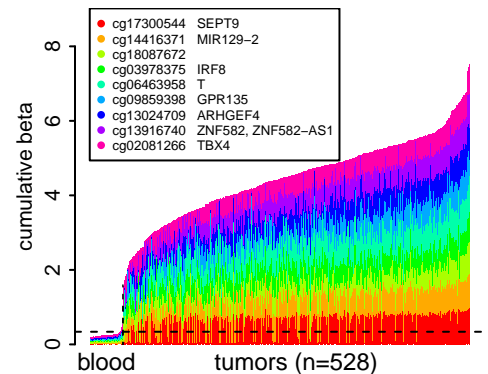

### HNSC set of 10 markers

AUC: 1

CumFrDet: 100 %, MaxFrDet: 100%

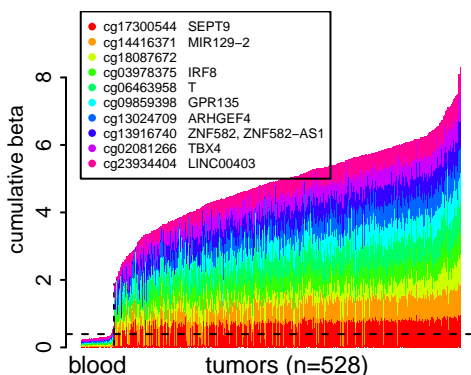

### HNSC set of 11 markers

AUC: 1

CumFrDet: 100 %, MaxFrDet: 100%

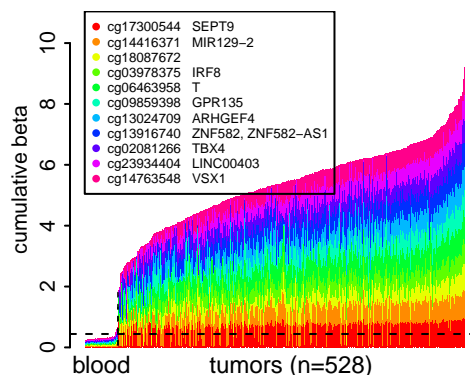

### HNSC set of 12 markers

AUC: 1

CumFrDet: 100 %, MaxFrDet: 100%

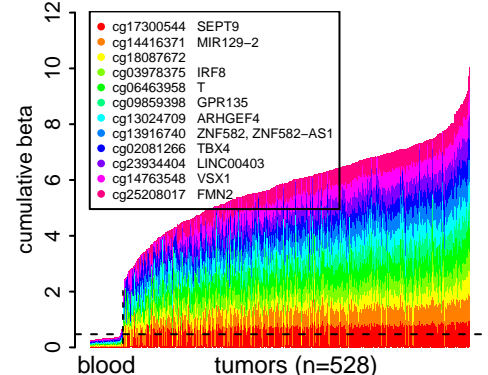



### LIHC set of 1 markers

AUC: 0.977

CumFrDet: 78 %, MaxFrDet: 97.3%

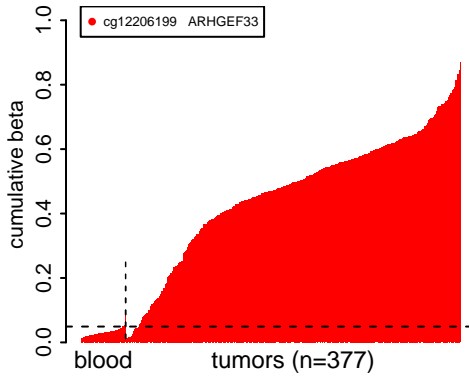

### LIHC set of 2 markers

AUC: 0.988

CumFrDet: 88.9 %, MaxFrDet: 97.3%

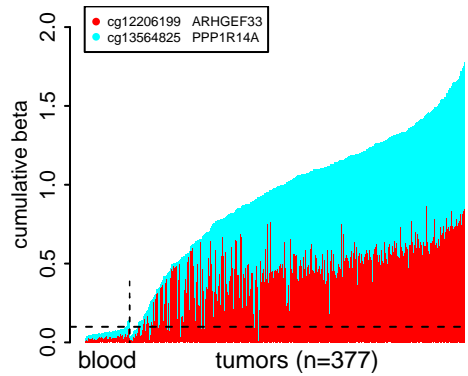

### LIHC set of 3 markers

AUC: 0.993

CumFrDet: 94.2 %, MaxFrDet: 97.3%

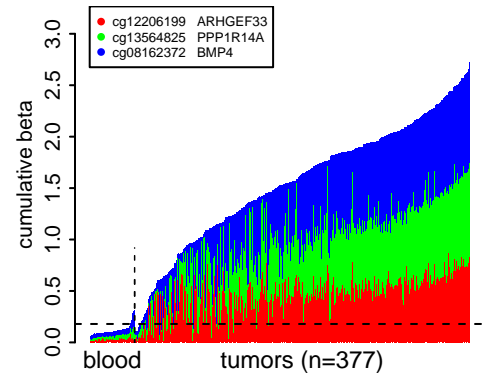

### LIHC set of 4 markers

AUC: 0.992

CumFrDet: 95.8 %, MaxFrDet: 97.3%

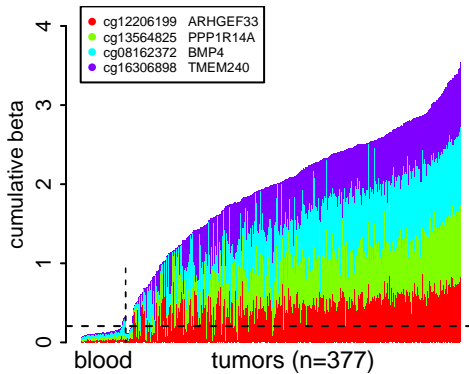

### LIHC set of 5 markers

AUC: 0.996

CumFrDet: 96.6 %, MaxFrDet: 97.3%

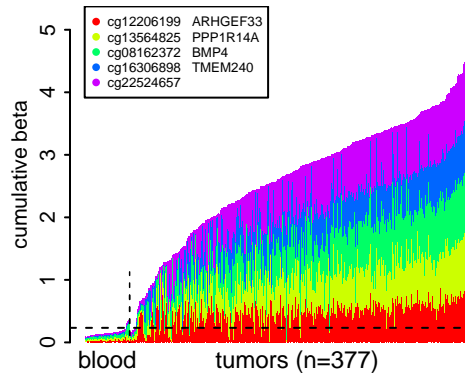

### LIHC set of 6 markers

AUC: 0.996

CumFrDet: 97.1 %, MaxFrDet: 97.3%

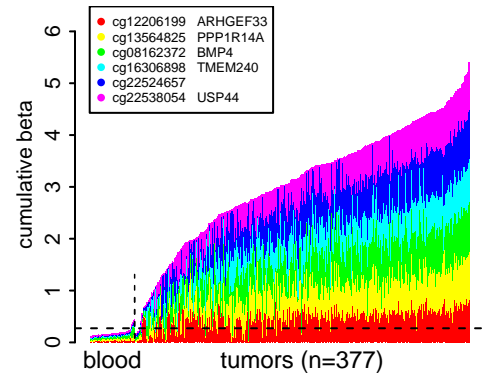

### LIHC set of 7 markers

AUC: 0.995

CumFrDet: 97.3 %, MaxFrDet: 97.3%

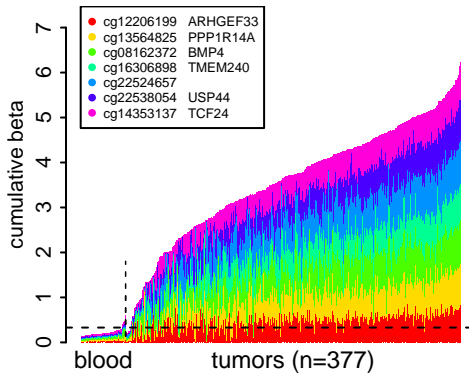

### LIHC set of 8 markers

AUC: 0.995

CumFrDet: 97.3 %, MaxFrDet: 97.3%

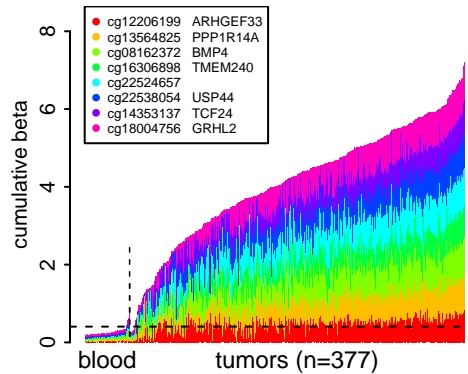

### LIHC set of 9 markers

AUC: 0.997

CumFrDet: 97.3 %, MaxFrDet: 97.3%

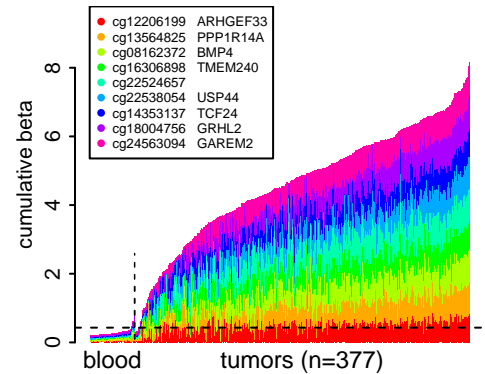

### LIHC set of 10 markers

AUC: 0.997

CumFrDet: 97.3 %, MaxFrDet: 97.3%

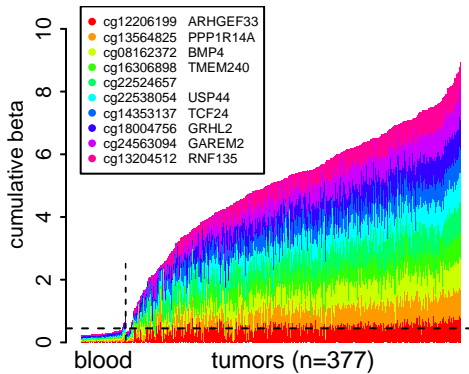

### LIHC set of 11 markers

AUC: 0.998

CumFrDet: 97.3 %, MaxFrDet: 97.3%

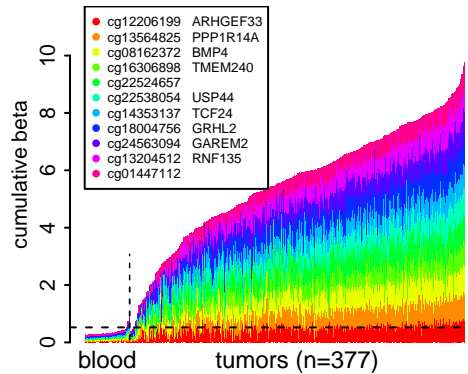

### LIHC set of 12 markers

AUC: 0.997

CumFrDet: 97.3 %, MaxFrDet: 97.3%

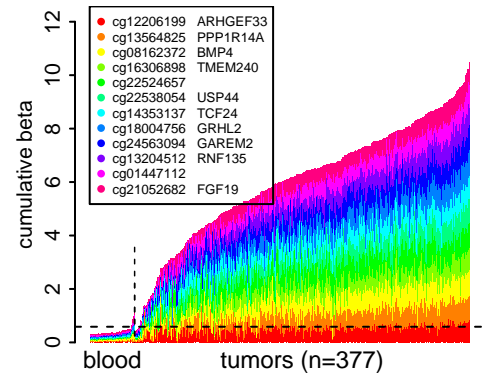

### LUAD set of 1 markers

AUC: 0.964

CumFrDet: 71.5 %, MaxFrDet: 98.7%

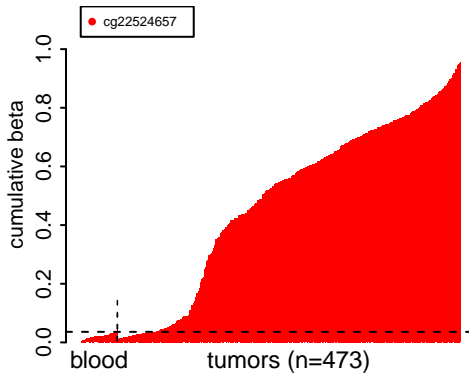

### LUAD set of 2 markers

AUC: 0.993

CumFrDet: 89.6 %, MaxFrDet: 98.7%

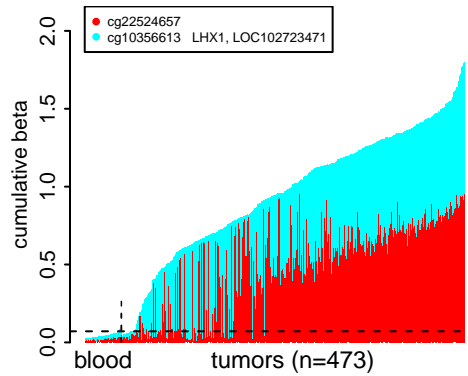

### LUAD set of 3 markers

AUC: 0.998

CumFrDet: 94.3 %, MaxFrDet: 98.7%

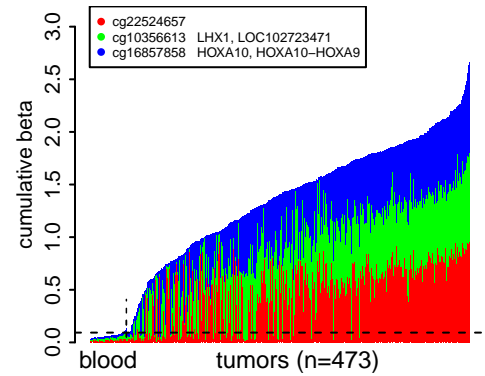

### LUAD set of 4 markers

AUC: 0.999

CumFrDet: 96.6 %, MaxFrDet: 98.7%

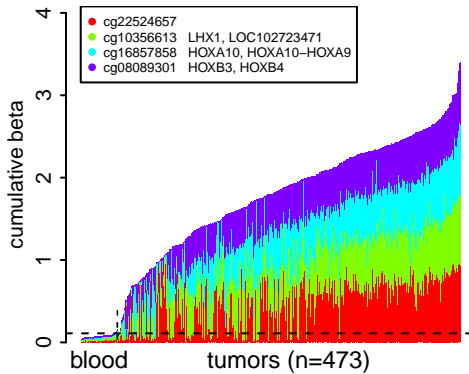

### LUAD set of 5 markers

AUC: 0.999

CumFrDet: 97 %, MaxFrDet: 98.7%

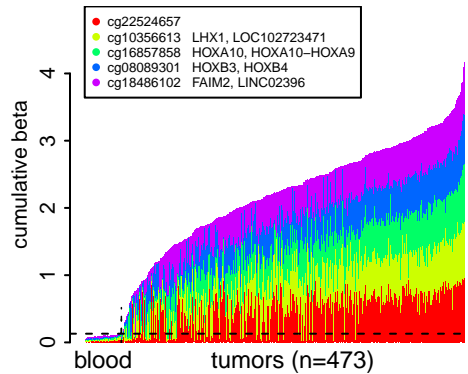

### LUAD set of 6 markers

AUC: 0.998

CumFrDet: 97.5 %, MaxFrDet: 98.7%

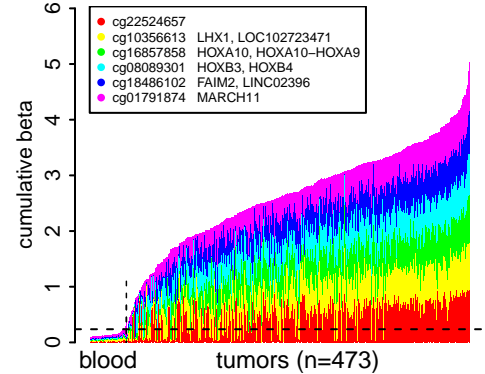

### LUAD set of 7 markers

AUC: 0.998

CumFrDet: 97.7 %, MaxFrDet: 98.7%

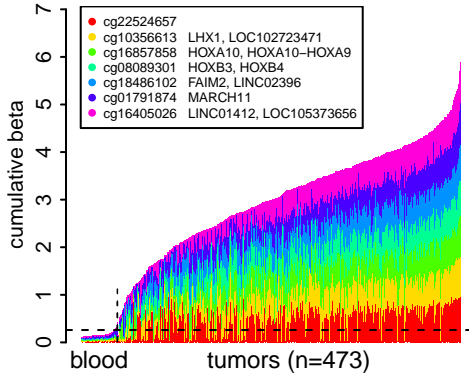

### LUAD set of 8 markers

AUC: 1

CumFrDet: 98.5 %, MaxFrDet: 98.7%

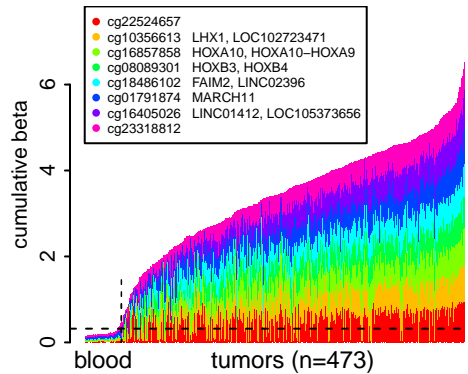

### LUAD set of 9 markers

AUC: 1

CumFrDet: 98.7 %, MaxFrDet: 98.7%

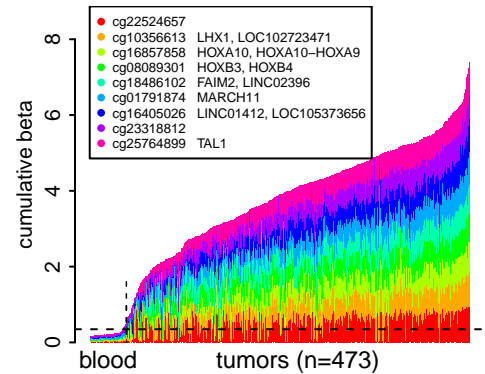

### LUAD set of 10 markers

AUC: 1

CumFrDet: 98.7 %, MaxFrDet: 98.7%

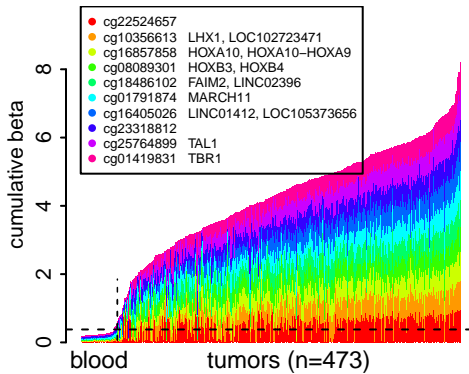

### LUAD set of 11 markers

AUC: 1

CumFrDet: 98.7 %, MaxFrDet: 98.7%

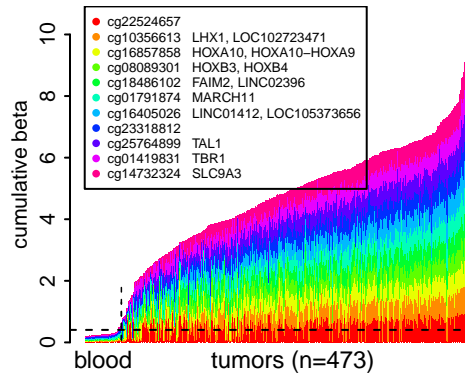

### LUAD set of 12 markers

AUC: 1

CumFrDet: 98.7 %, MaxFrDet: 98.7%

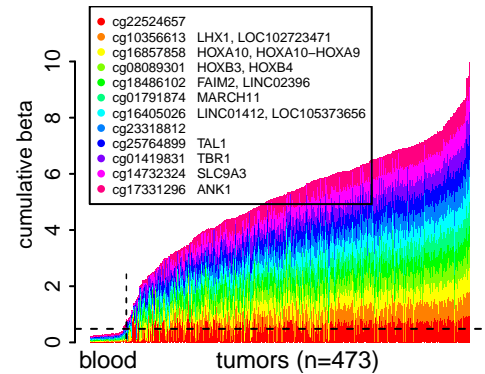

### LUSC set of 1 markers

AUC: 0.96

CumFrDet: 75.9 %, MaxFrDet: 97%

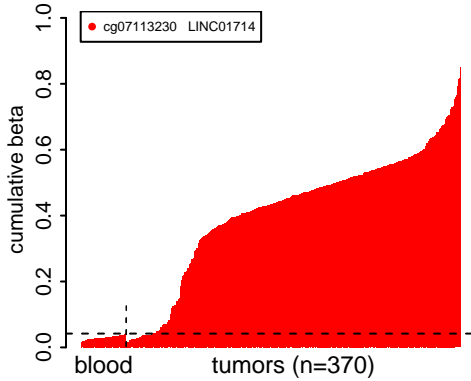

### LUSC set of 2 markers

AUC: 0.99

CumFrDet: 90.8 %, MaxFrDet: 97%

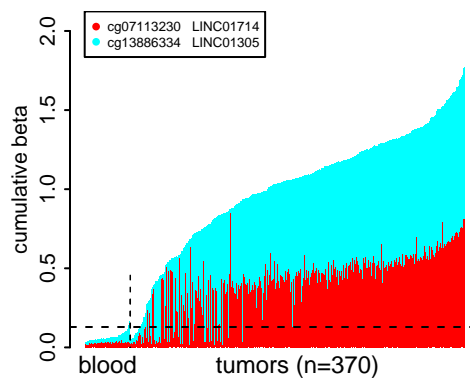

### LUSC set of 3 markers

AUC: 0.993

CumFrDet: 94.3 %, MaxFrDet: 97%

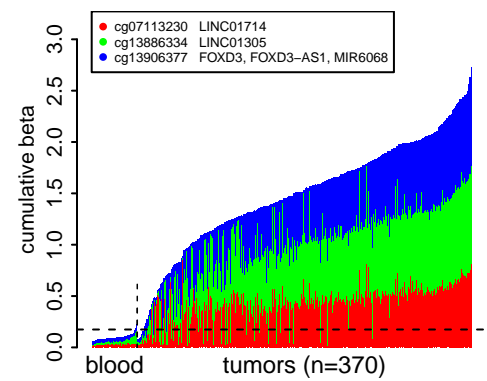

### LUSC set of 4 markers

AUC: 0.995

CumFrDet: 95.1 %, MaxFrDet: 97%

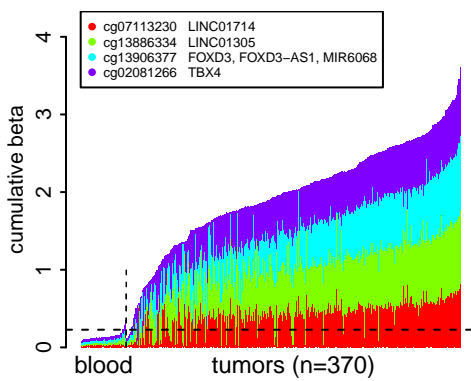

### LUSC set of 5 markers

AUC: 0.994

CumFrDet: 95.9 %, MaxFrDet: 97%

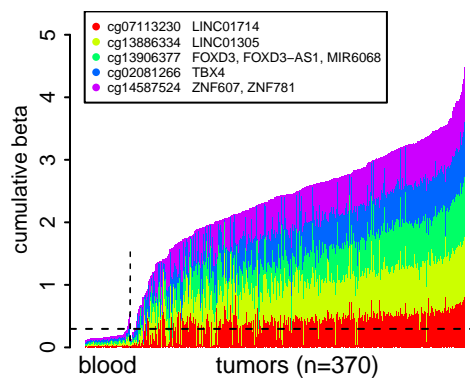

### LUSC set of 6 markers

AUC: 0.997

CumFrDet: 96.5 %, MaxFrDet: 97%

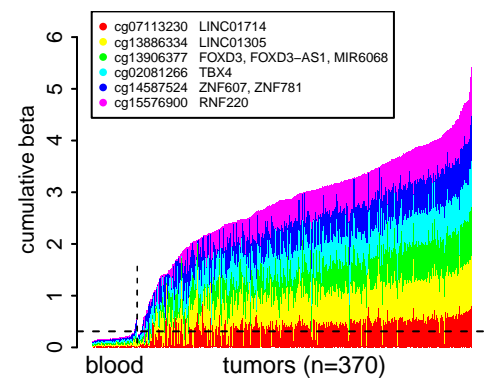

### LUSC set of 7 markers

AUC: 0.998

CumFrDet: 97 %, MaxFrDet: 97%

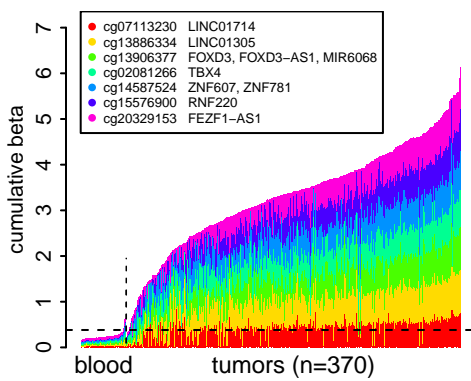

### LUSC set of 8 markers

AUC: 0.998

CumFrDet: 97 %, MaxFrDet: 97%

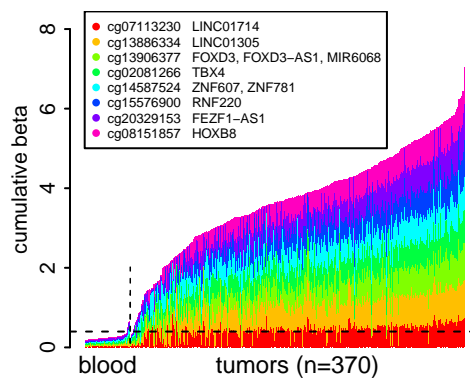

### LUSC set of 9 markers

AUC: 0.999

CumFrDet: 97 %, MaxFrDet: 97%

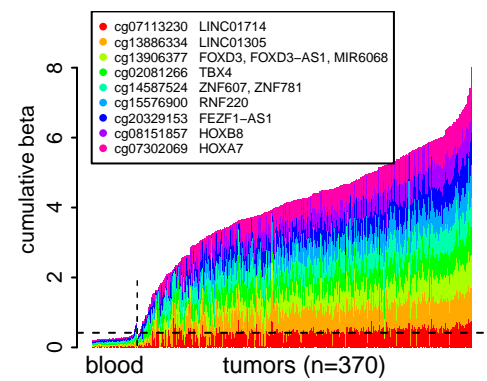

### LUSC set of 10 markers

AUC: 0.999

CumFrDet: 97 %, MaxFrDet: 97%

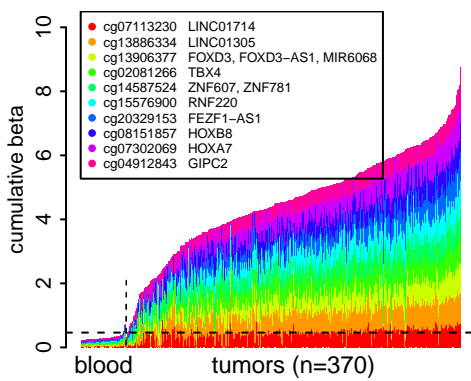

### LUSC set of 11 markers

AUC: 0.999

CumFrDet: 97 %, MaxFrDet: 97%

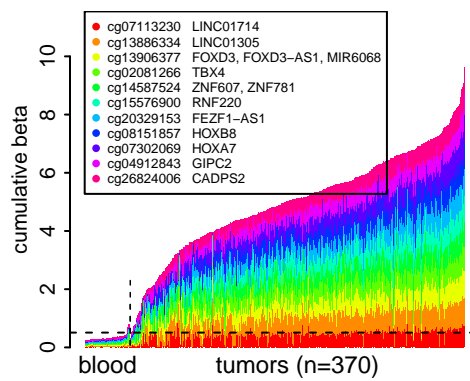

### LUSC set of 12 markers

AUC: 0.999

CumFrDet: 97 %, MaxFrDet: 97%

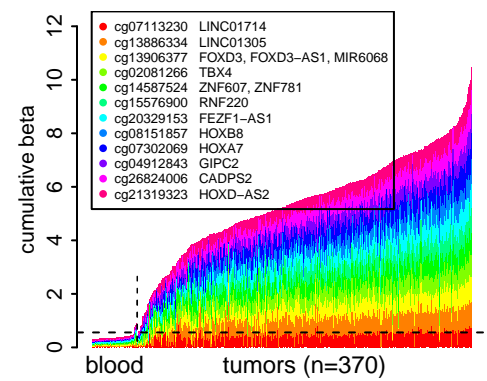

### PAAD set of 1 markers

AUC: 0.976

CumFrDet: 81.5 %, MaxFrDet: 88%

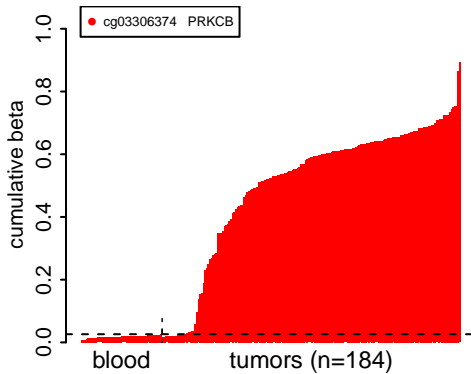

### PAAD set of 2 markers

AUC: 0.97

CumFrDet: 85.3 %, MaxFrDet: 88%

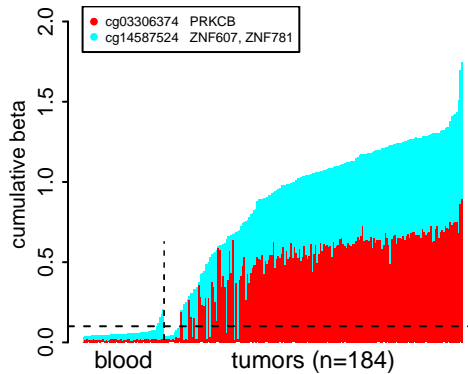

### PAAD set of 3 markers

AUC: 0.977

CumFrDet: 86.4 %, MaxFrDet: 88%

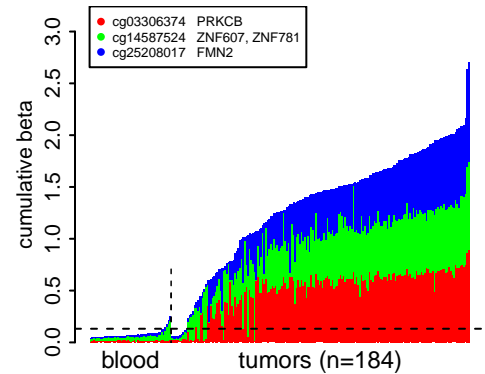

### PAAD set of 4 markers

AUC: 0.971

CumFrDet: 87 %, MaxFrDet: 88%

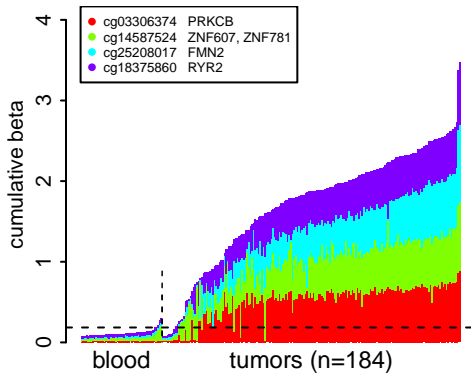

### PAAD set of 5 markers

AUC: 0.972

CumFrDet: 87.5 %, MaxFrDet: 88%

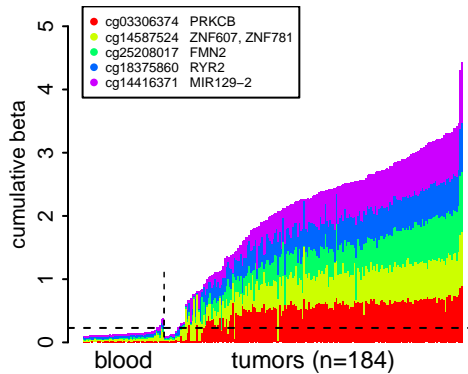

### PAAD set of 6 markers

AUC: 0.969

CumFrDet: 88 %, MaxFrDet: 88%

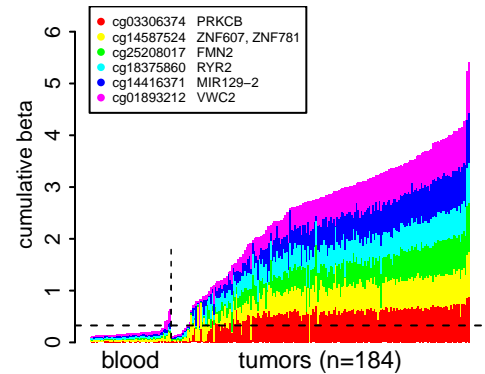

### PAAD set of 7 markers

AUC: 0.969

CumFrDet: 88 %, MaxFrDet: 88%

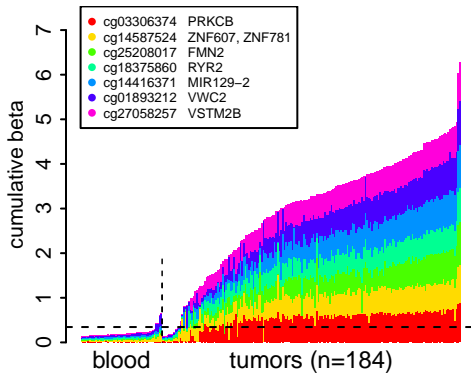

### PAAD set of 8 markers

AUC: 0.967

CumFrDet: 88 %, MaxFrDet: 88%

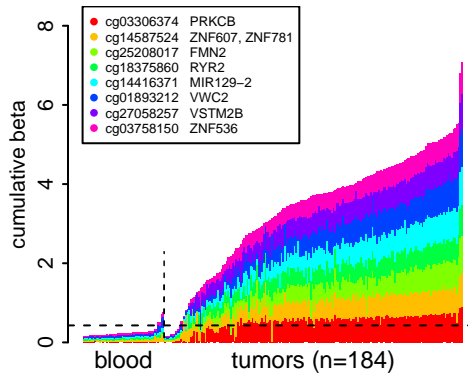

### PAAD set of 9 markers

AUC: 0.965

CumFrDet: 88 %, MaxFrDet: 88%

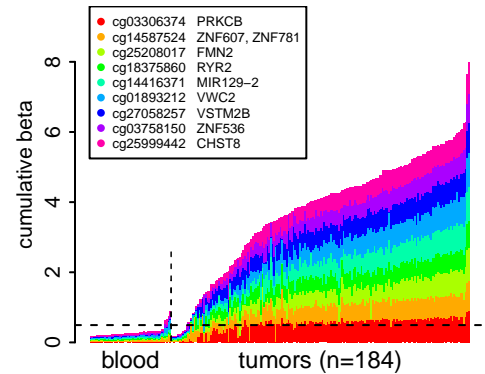

### PAAD set of 10 markers

AUC: 0.965

CumFrDet: 88 %, MaxFrDet: 88%

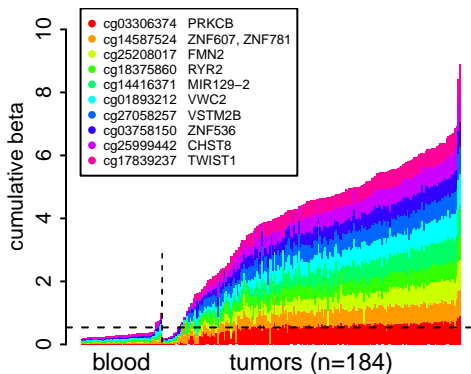

### PAAD set of 11 markers

AUC: 0.965

CumFrDet: 88 %, MaxFrDet: 88%

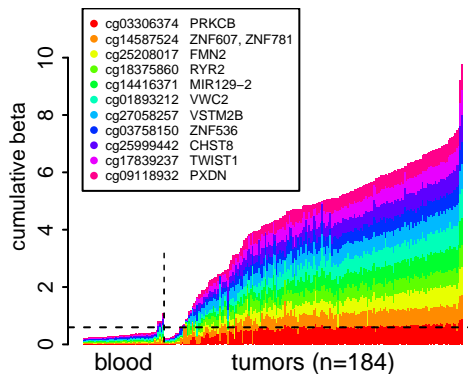

### PAAD set of 12 markers

AUC: 0.963

CumFrDet: 88 %, MaxFrDet: 88%

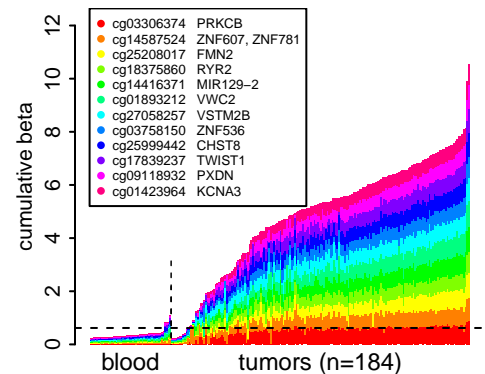

### PCPG set of 1 markers

AUC: 0.98

CumFrDet: 77.7 %, MaxFrDet: 92.7%

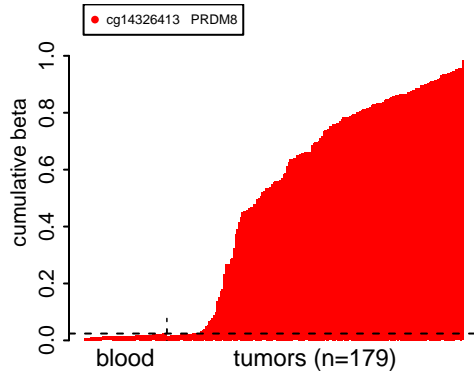

### PCPG set of 2 markers

AUC: 0.999

CumFrDet: 92.7 %, MaxFrDet: 92.7%

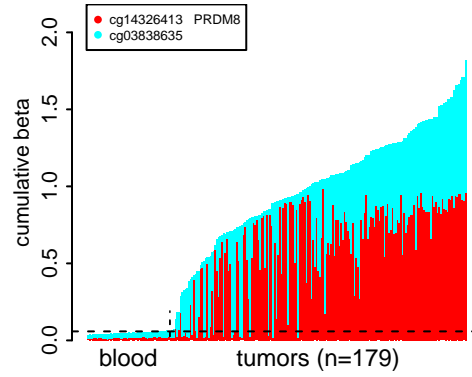

### PRAD set of 1 markers

AUC: 0.997

CumFrDet: 77.5 %, MaxFrDet: 97.4%

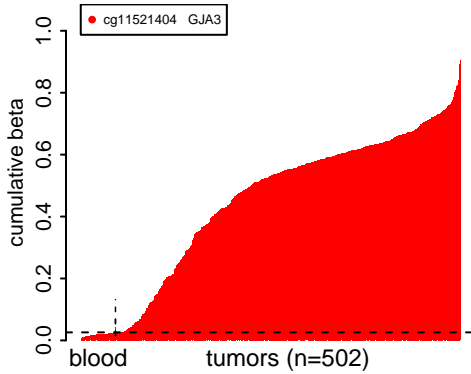

### PRAD set of 2 markers

AUC: 0.998

CumFrDet: 90 %, MaxFrDet: 97.4%

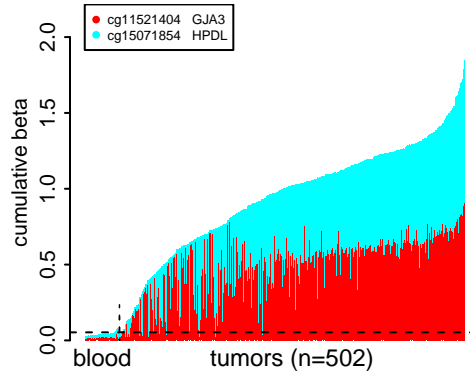

### PRAD set of 3 markers

AUC: 0.999

CumFrDet: 96.2 %, MaxFrDet: 97.4%

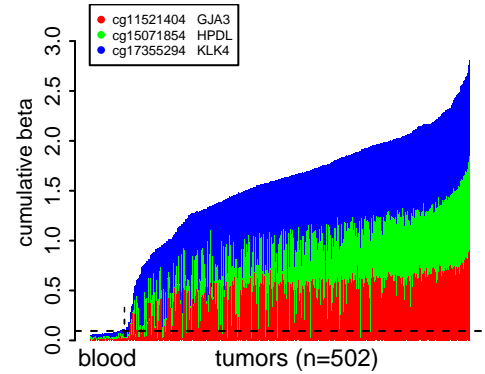

### PRAD set of 4 markers

AUC: 0.999

CumFrDet: 96.8 %, MaxFrDet: 97.4%

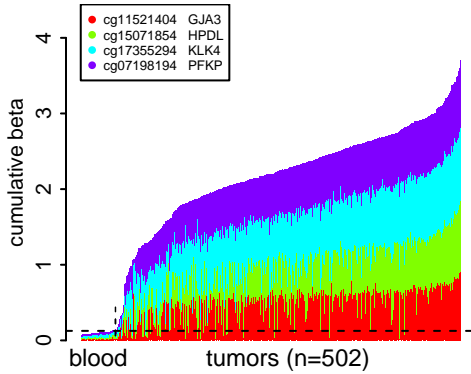

### PRAD set of 5 markers

AUC: 0.997

CumFrDet: 97 %, MaxFrDet: 97.4%

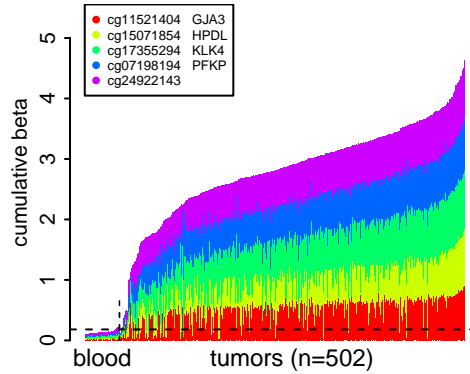

### PRAD set of 6 markers

AUC: 0.998

CumFrDet: 97.4 %, MaxFrDet: 97.4%

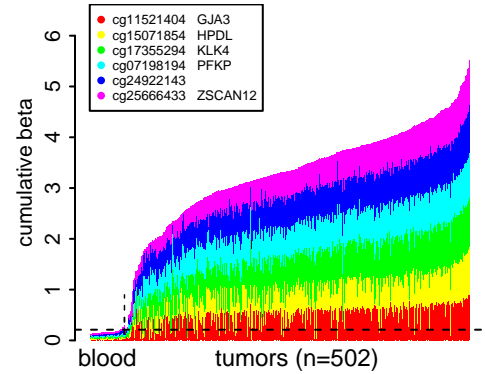

### PRAD set of 7 markers

AUC: 0.998

CumFrDet: 97.4 %, MaxFrDet: 97.4%

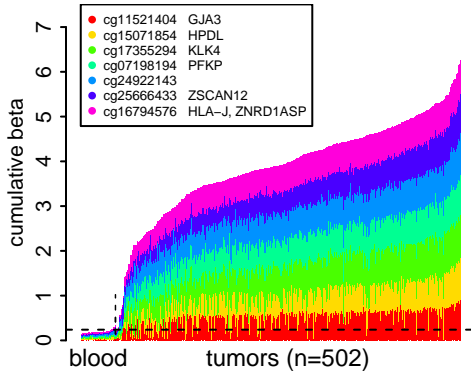

### PRAD set of 8 markers

AUC: 0.997

CumFrDet: 97.4 %, MaxFrDet: 97.4%

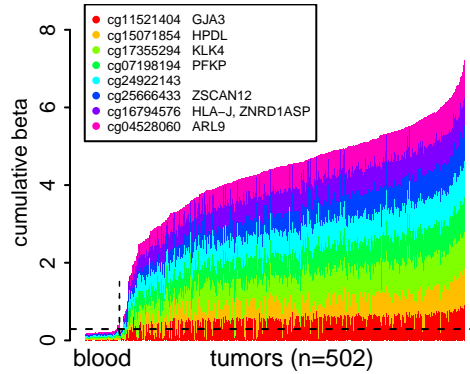

### PRAD set of 9 markers

AUC: 0.996

CumFrDet: 97.4 %, MaxFrDet: 97.4%

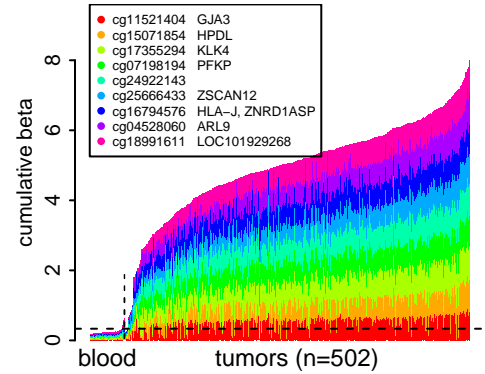

### PRAD set of 10 markers

AUC: 0.996

CumFrDet: 97.4 %, MaxFrDet: 97.4%

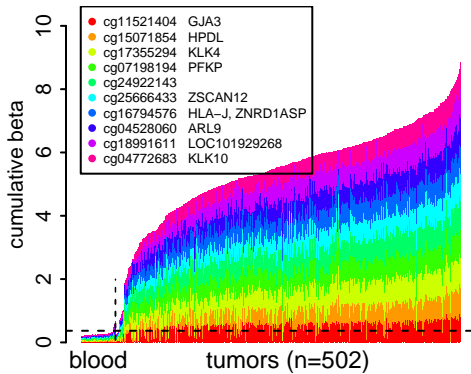

### PRAD set of 11 markers

AUC: 0.997

CumFrDet: 97.4 %, MaxFrDet: 97.4%

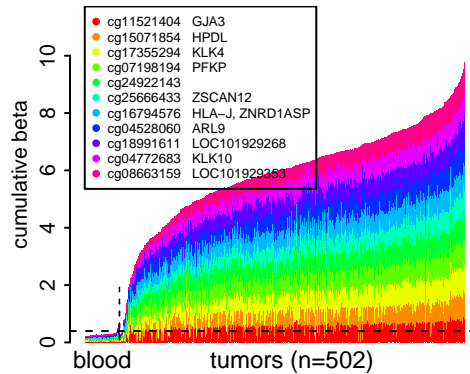

### PRAD set of 12 markers

AUC: 0.996

CumFrDet: 97.4 %, MaxFrDet: 97.4%

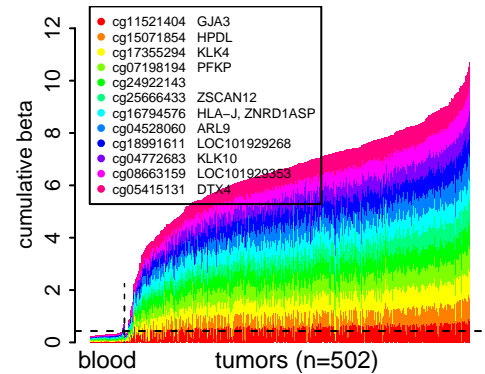

### READ set of 1 markers

AUC: 1

CumFrDet: 98 %, MaxFrDet: 100%

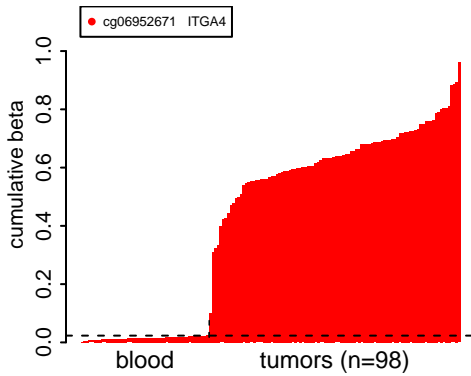

### READ set of 2 markers

AUC: 1

CumFrDet: 100 %, MaxFrDet: 100%

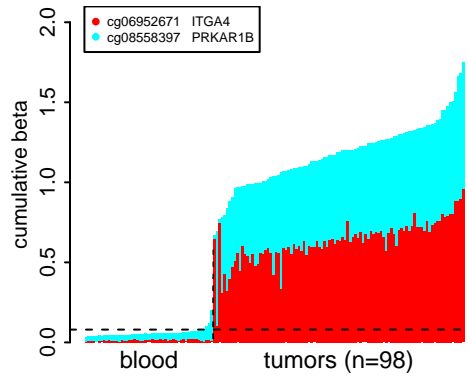

### READ set of 3 markers

AUC: 1

CumFrDet: 100 %, MaxFrDet: 100%

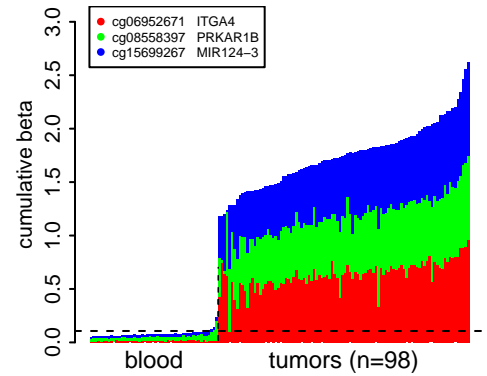

### READ set of 4 markers

AUC: 1

CumFrDet: 100 %, MaxFrDet: 100%

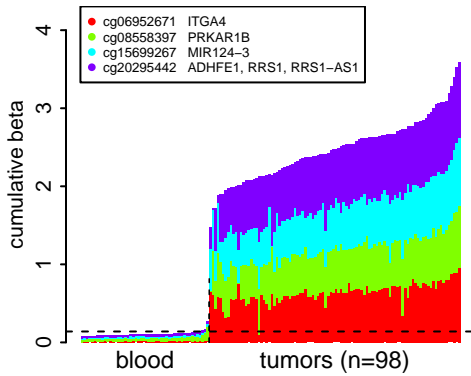

### READ set of 5 markers

AUC: 1

CumFrDet: 100 %, MaxFrDet: 100%

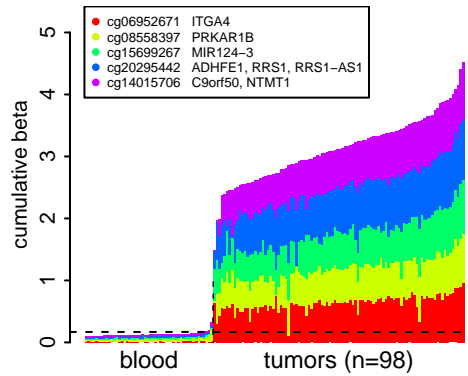

### READ set of 6 markers

AUC: 1

CumFrDet: 100 %, MaxFrDet: 100%

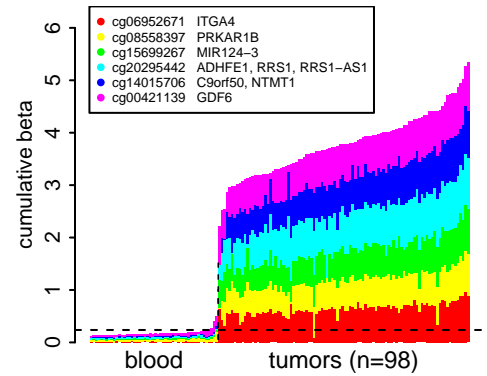

### READ set of 7 markers

AUC: 1

CumFrDet: 100 %, MaxFrDet: 100%

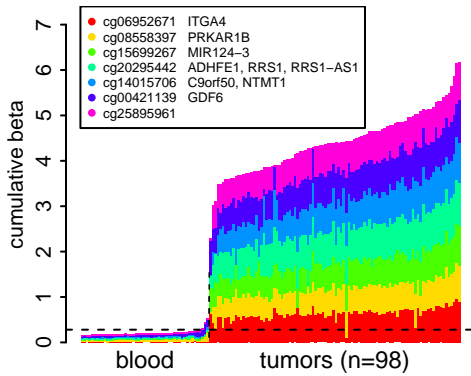

### READ set of 8 markers

AUC: 1

CumFrDet: 100 %, MaxFrDet: 100%

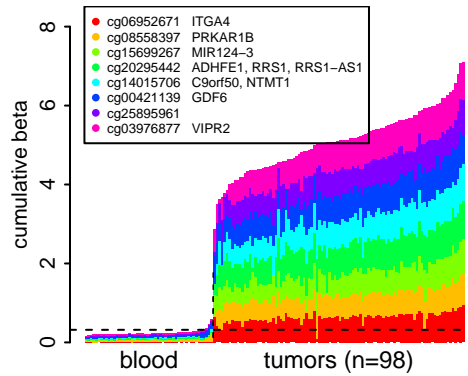

### READ set of 9 markers

AUC: 1

CumFrDet: 100 %, MaxFrDet: 100%

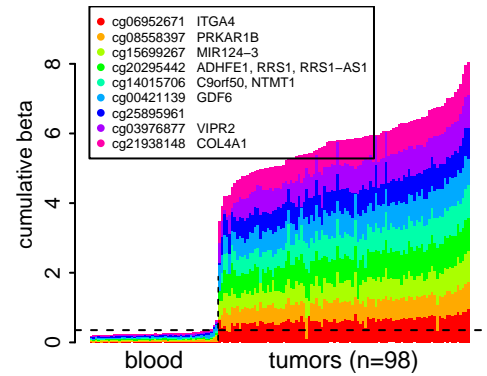

### READ set of 10 markers

AUC: 1

CumFrDet: 100 %, MaxFrDet: 100%

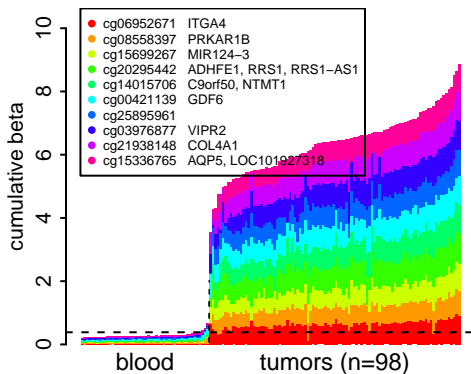

### READ set of 11 markers

AUC: 1

CumFrDet: 100 %, MaxFrDet: 100%

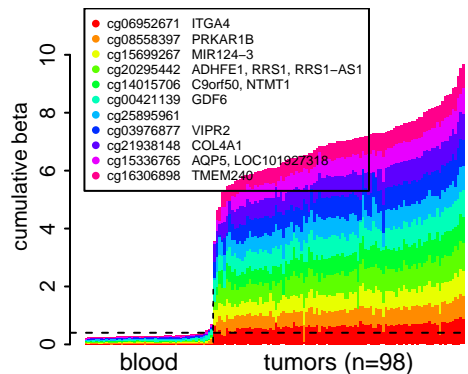

### READ set of 12 markers

AUC: 1

CumFrDet: 100 %, MaxFrDet: 100%

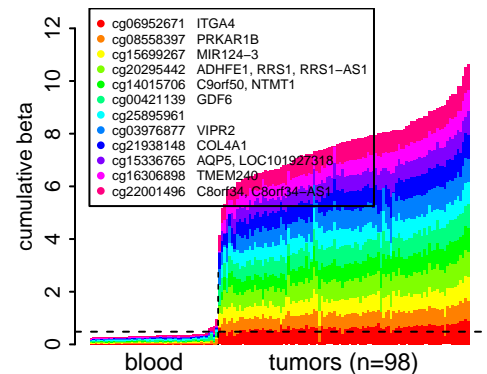

### SKCM set of 1 markers

AUC: 0.976

CumFrDet: 71.4 %, MaxFrDet: 100%

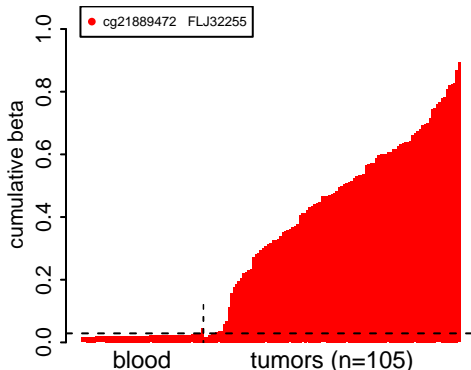

### SKCM set of 2 markers

AUC: 0.989

CumFrDet: 89.5 %, MaxFrDet: 100%

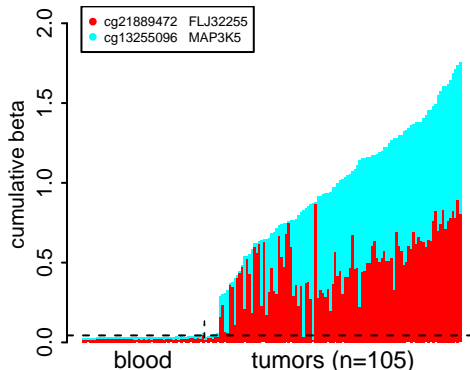

### SKCM set of 3 markers

AUC: 1

CumFrDet: 100 %, MaxFrDet: 100%

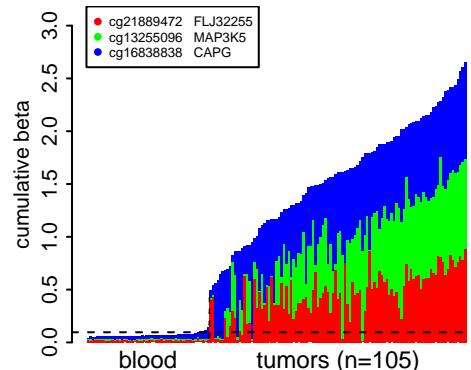

### SKCM set of 4 markers

AUC: 1

CumFrDet: 100 %, MaxFrDet: 100%

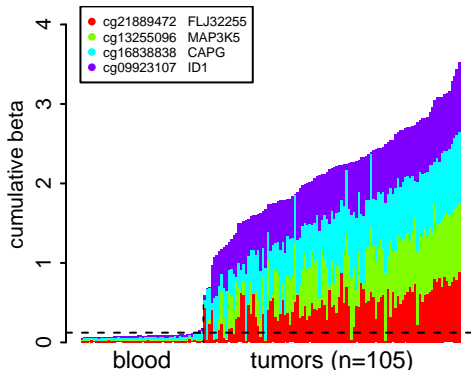

### SKCM set of 5 markers

AUC: 1

CumFrDet: 100 %, MaxFrDet: 100%

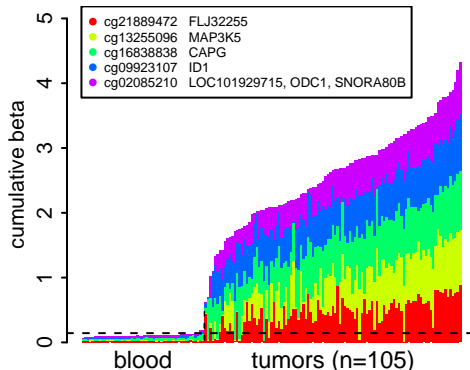

### SKCM set of 6 markers

AUC: 1

CumFrDet: 100 %, MaxFrDet: 100%

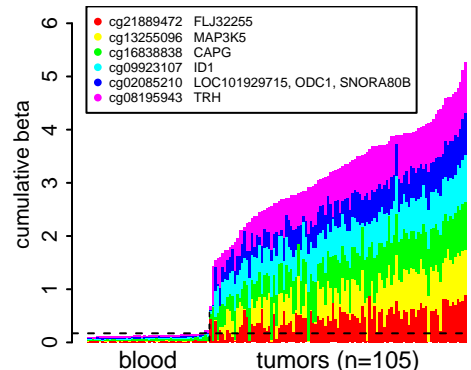

### SKCM set of 7 markers

AUC: 1

CumFrDet: 100 %, MaxFrDet: 100%

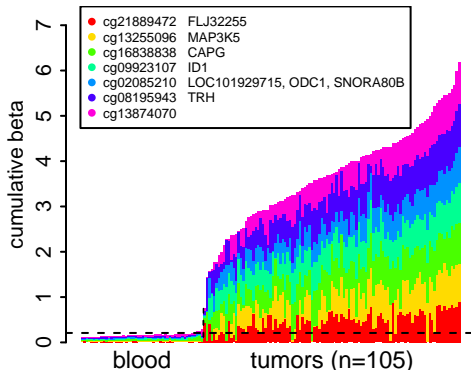

### SKCM set of 8 markers

AUC: 1

CumFrDet: 100 %, MaxFrDet: 100%

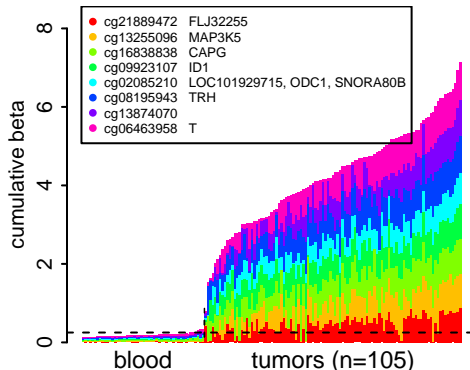

### SKCM set of 9 markers

AUC: 1

CumFrDet: 100 %, MaxFrDet: 100%

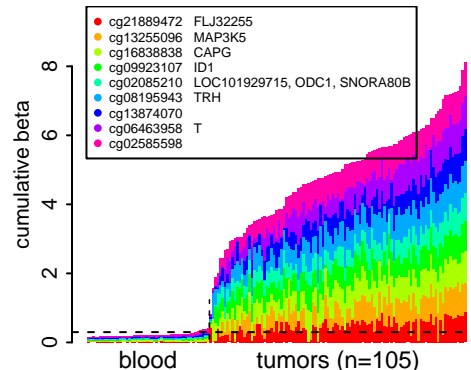

### SKCM set of 10 markers

AUC: 1

CumFrDet: 100 %, MaxFrDet: 100%

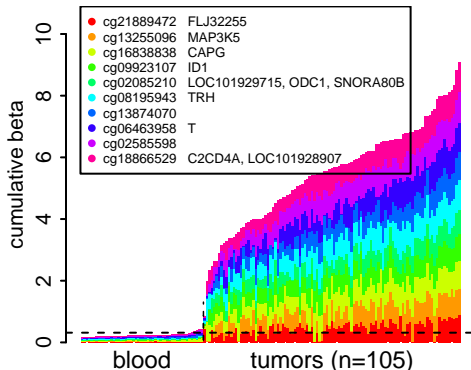

### SKCM set of 11 markers

AUC: 1

CumFrDet: 100 %, MaxFrDet: 100%

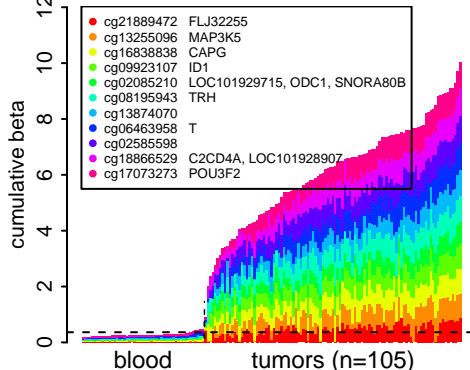

### SKCM set of 12 markers

AUC: 1

CumFrDet: 100 %, MaxFrDet: 100%

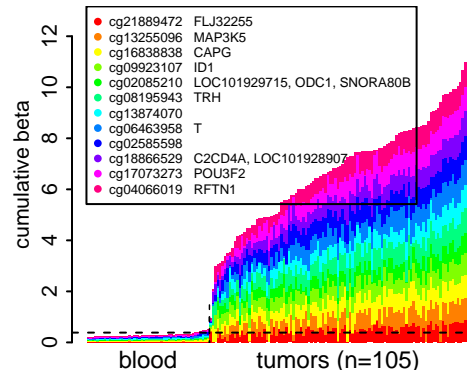



### STAD set of 1 markers

AUC: 0.978

CumFrDet: 94.4 %, MaxFrDet: 98.5%

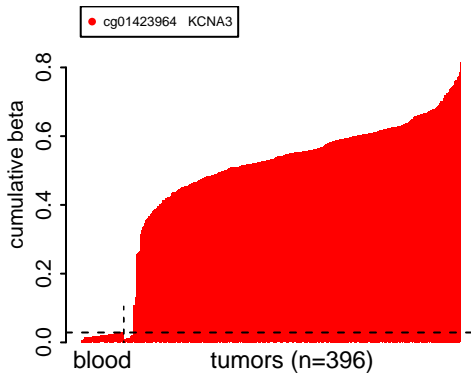

### STAD set of 2 markers

AUC: 0.992

CumFrDet: 97.2 %, MaxFrDet: 98.5%

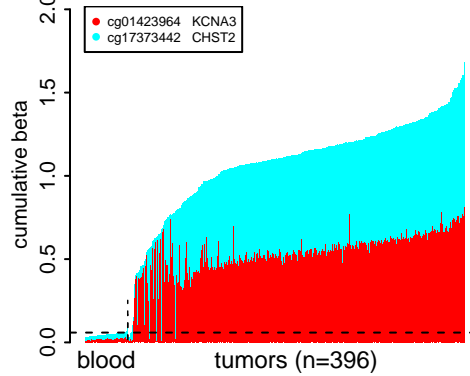

### STAD set of 3 markers

AUC: 0.997

CumFrDet: 97.7 %, MaxFrDet: 98.5%

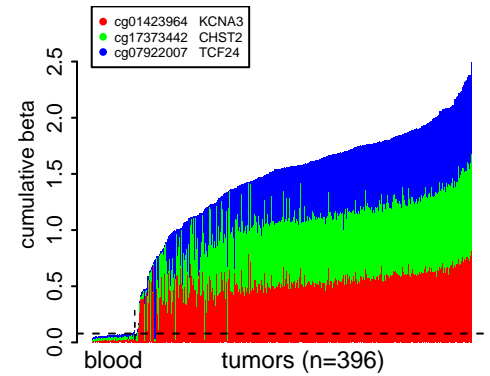

### STAD set of 4 markers

AUC: 0.997

CumFrDet: 98 %, MaxFrDet: 98.5%

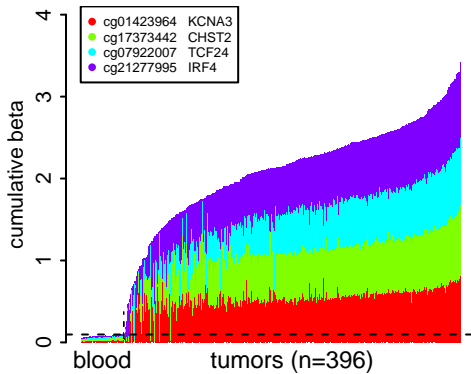

### STAD set of 5 markers

AUC: 1

CumFrDet: 98.5 %, MaxFrDet: 98.5%

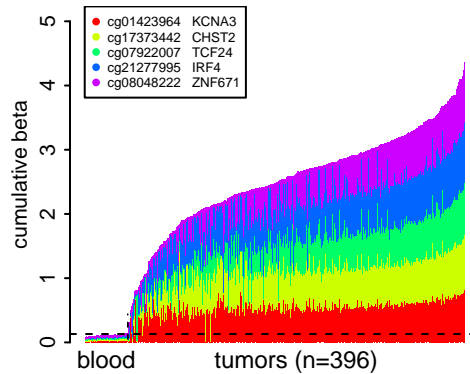

### STAD set of 6 markers

AUC: 1

CumFrDet: 98.5 %, MaxFrDet: 98.5%

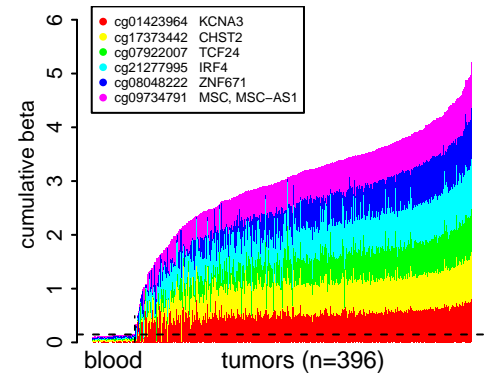

### STAD set of 7 markers

AUC: 1

CumFrDet: 98.5 %, MaxFrDet: 98.5%

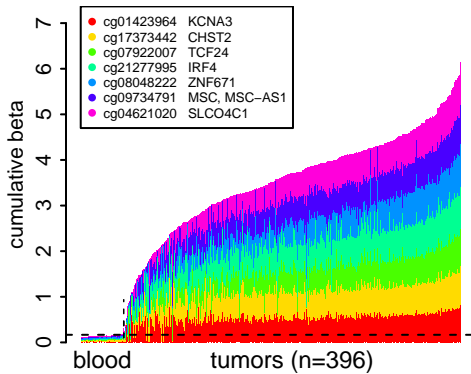

### STAD set of 8 markers

AUC: 1

CumFrDet: 98.5 %, MaxFrDet: 98.5%

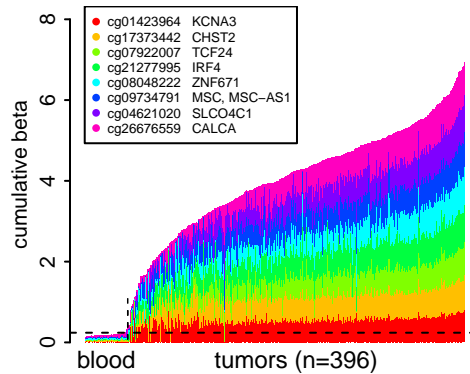

### STAD set of 9 markers

AUC: 1

CumFrDet: 98.5 %, MaxFrDet: 98.5%

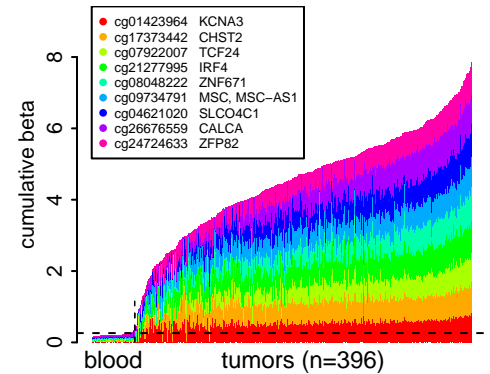

### STAD set of 10 markers

AUC: 1

CumFrDet: 98.5 %, MaxFrDet: 98.5%

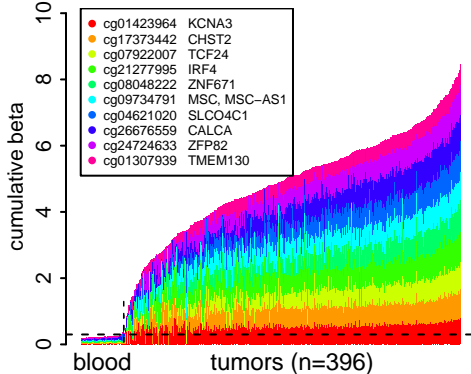

### STAD set of 11 markers

AUC: 1

CumFrDet: 98.5 %, MaxFrDet: 98.5%

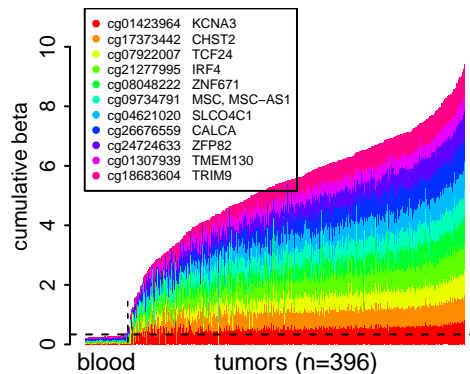

### STAD set of 12 markers

AUC: 1

CumFrDet: 98.5 %, MaxFrDet: 98.5%

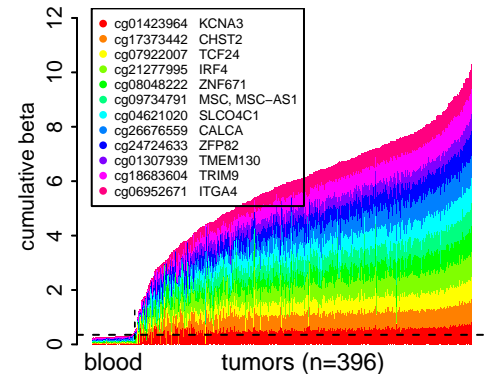

### UCEC set of 1 markers

AUC: 0.964

CumFrDet: 92 %, MaxFrDet: 100%

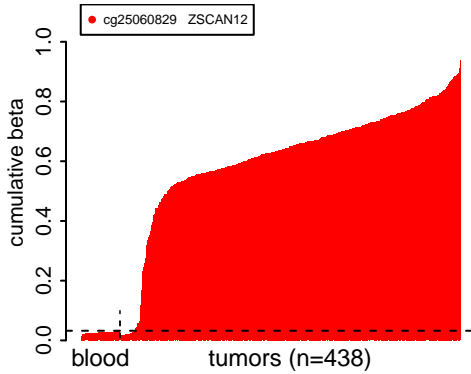

### UCEC set of 2 markers

AUC: 0.991

CumFrDet: 97.3 %, MaxFrDet: 100%

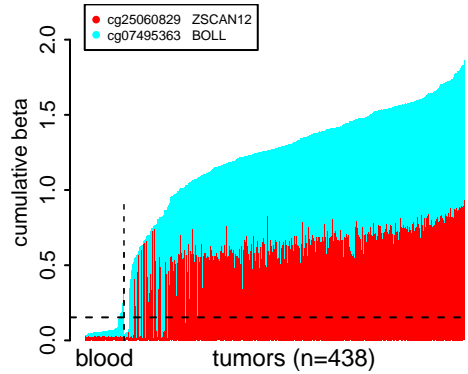

### UCEC set of 3 markers

AUC: 0.998

CumFrDet: 99.5 %, MaxFrDet: 100%

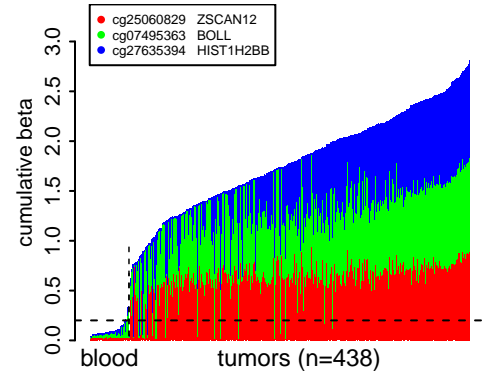

### UCEC set of 4 markers

AUC: 1

CumFrDet: 100 %, MaxFrDet: 100%

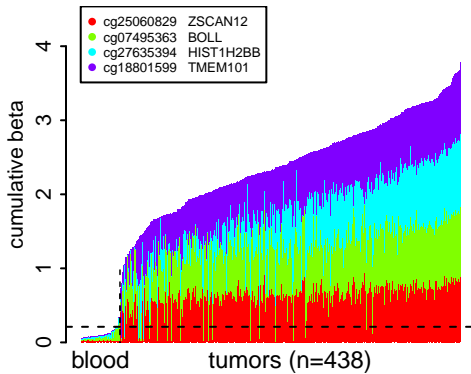

### UCEC set of 5 markers

AUC: 1

CumFrDet: 100 %, MaxFrDet: 100%

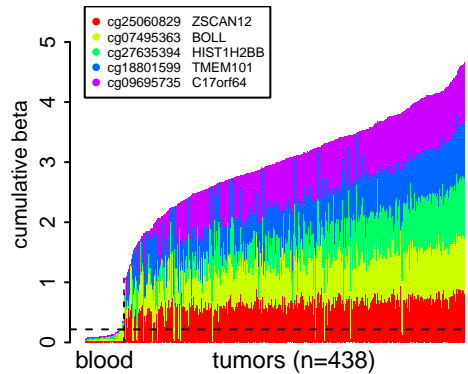

### UCEC set of 6 markers

AUC: 1

CumFrDet: 100 %, MaxFrDet: 100%

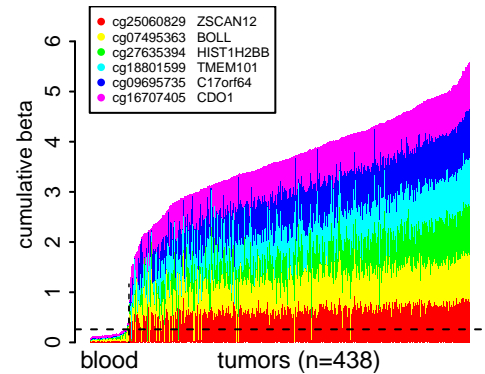

### UCEC set of 7 markers

AUC: 1

CumFrDet: 100 %, MaxFrDet: 100%

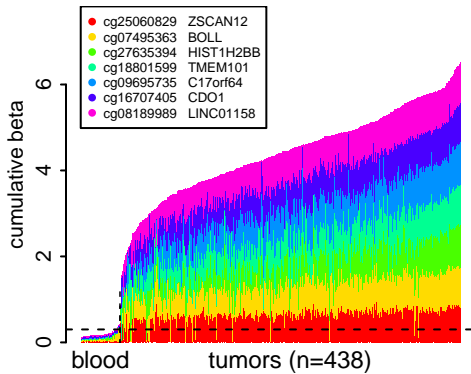

### UCEC set of 8 markers

AUC: 1

CumFrDet: 100 %, MaxFrDet: 100%

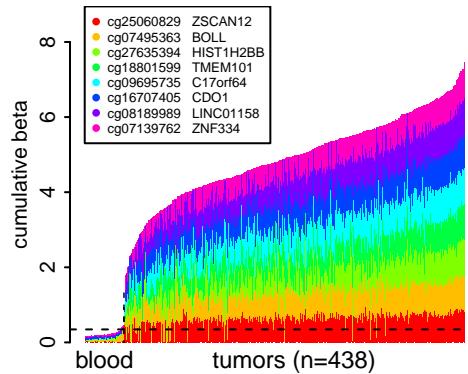

### UCEC set of 9 markers

AUC: 1

CumFrDet: 100 %, MaxFrDet: 100%

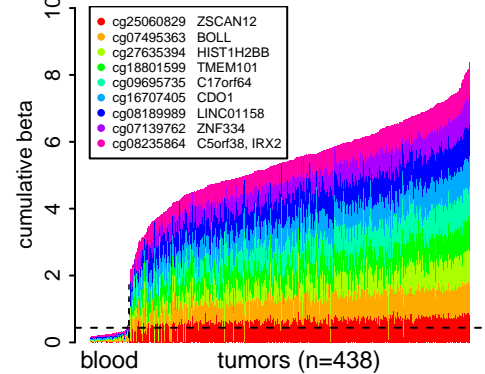

### UCEC set of 10 markers

AUC: 1

CumFrDet: 100 %, MaxFrDet: 100%

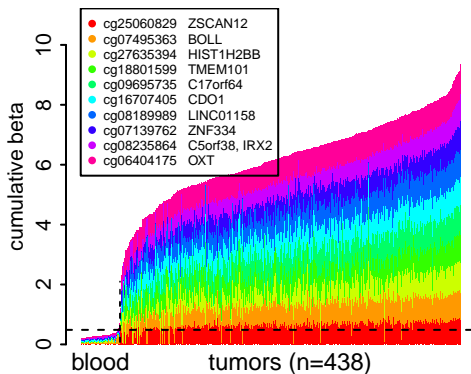

### UCEC set of 11 markers

AUC: 1

CumFrDet: 100 %, MaxFrDet: 100%

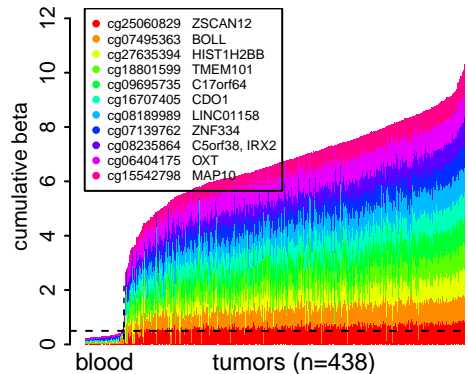

### UCEC set of 12 markers

AUC: 1

CumFrDet: 100 %, MaxFrDet: 100%

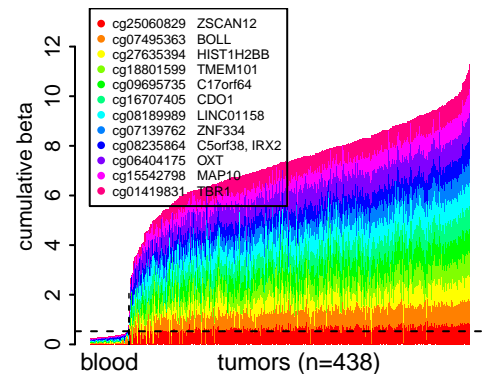

Supplement: Supplementary file 6 [file 2]
