# Supplementary material
Source: publisher figshare collection journal article supplement (https://tandf.figshare.com/articles/dataset/_/5902240)
Supplement: Supplementary file 1 [file 2]

### Numbers of marker candidates per cancer type

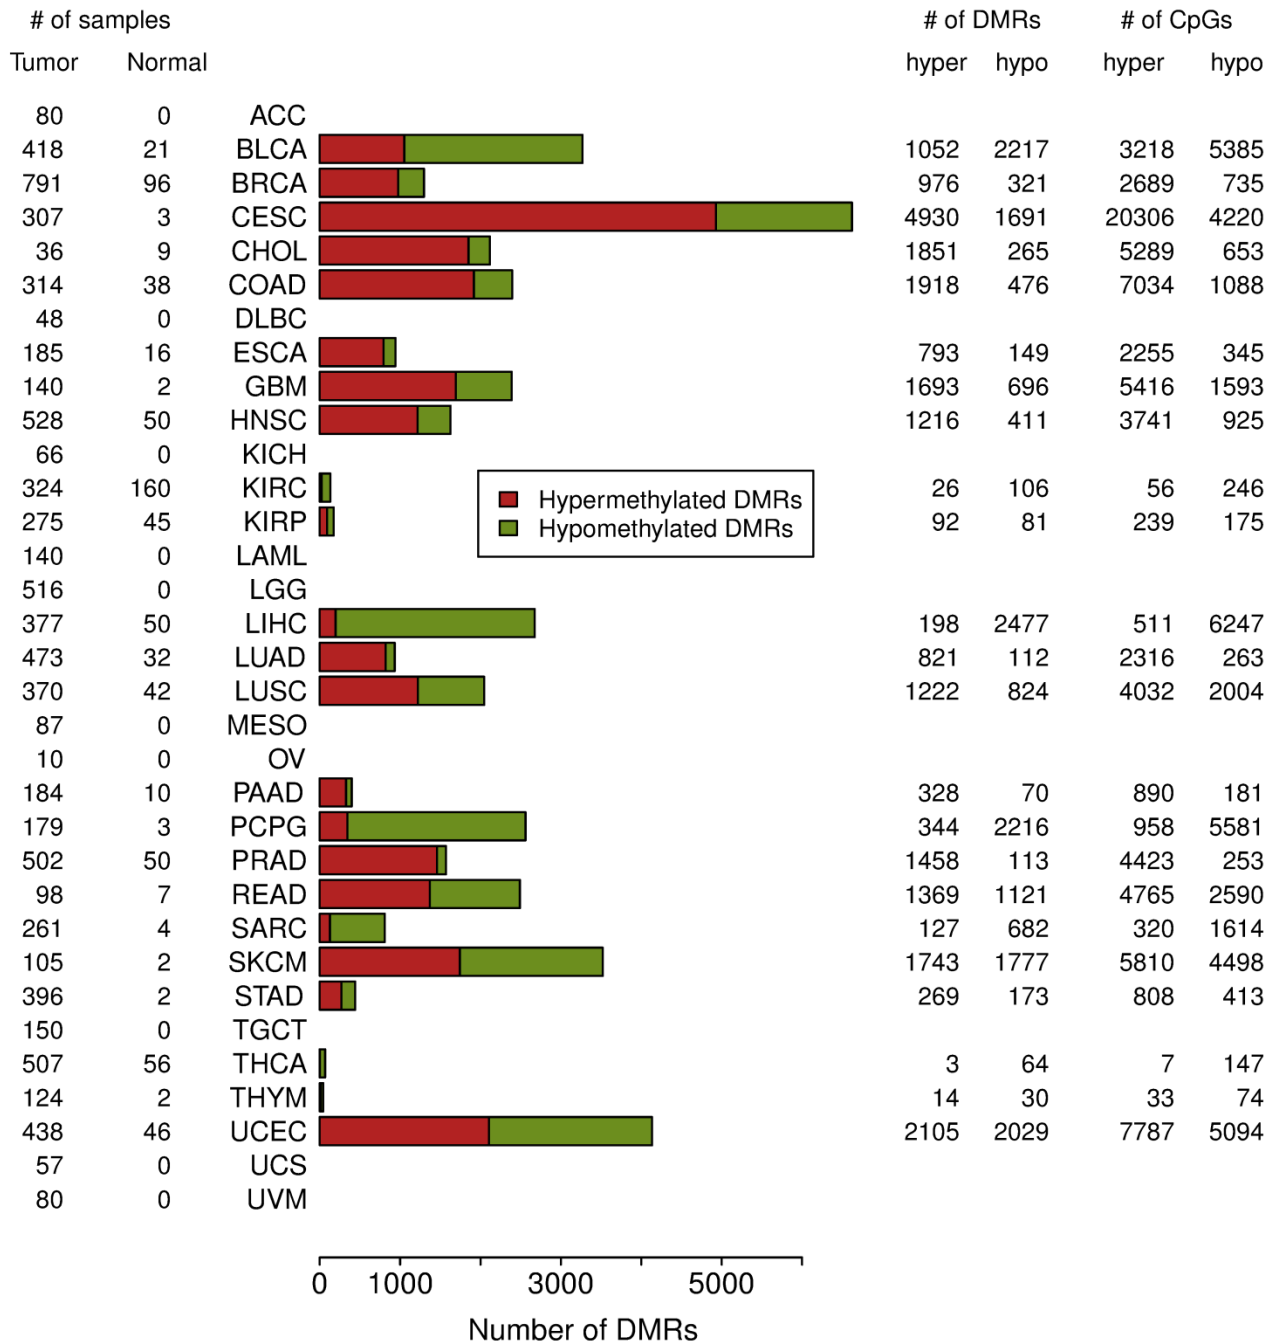

**Figure S1**

Numbers of marker candidate regions (DMRs) per cancer type. The cancer types without normal samples available were not tested and therefore only 23 TCGA cancer types have DMR numbers displayed. The barplots show the numbers of hypermethylated and hypomethylated DMRs per cancer type.
